# Supplementary material
Source: publisher figshare collection journal article supplement (https://gsapubs.figshare.com/ndownloader/files/23307896)
Supplement: Supplementary file 1 [file 23307896]

## Sheet: DR11. GDGT Fractional Abundance
Table DR1: GDGT Fractional Abundance
										Isoprenoidal GDGTs						Branched GDGTs
Leg	Site	Core	Section	Interval (cm)	Depth (mbsf)	Age (Ma)	New/Stored	isoGDGT %		GDGT-0	GDGT-1	GDGT-2	GDGT-3	CREN	CREN'	GDGT-Ia	GDGT-Ib	GDGT-Ic	GDGT-IIa	GDGT-IIb	GDGT-IIc	GDGT-IIIa	GDGT-IIIb	GDGT-IIIc
94	608	21	5	52-55	191.835	8.92358	Stored	62.1098		0.488255	0.0732305	0.0712056	0.00710091	0.324453	0.0357545	0.474374	0.0294073	0.0382086	0.10584	0.0962357	0.018041	0.187926	0.0349972	0.0149699
94	608	22	1	79-82	195.705	9.20486	Stored	51.4376		0.535299	0.0689097	0.0672572	0.006534	0.289572	0.0324284	0.423443	0.0295318	0.0457988	0.0528936	0.141145	0.0165595	0.211584	0.0720557	0.00698899
94	608	22	2	104-107	197.455	9.29289	Stored	62.5266		0.468041	0.0794788	0.0696385	0.0085675	0.337317	0.0369569	0.483722	0.0397016	0.0418841	0.0633715	0.145076	0.0226964	0.146785	0.0448322	0.0119316
94	608	22	3	105-108	198.965	9.36991	Stored	64.7794		0.473104	0.0745304	0.0732541	0.00880513	0.333544	0.0367624	0.553405	0.0404977	0.0501037	0.0445783	0.106341	0.0204413	0.0957784	0.071113	0.0177416
94	608	22	4	55-58	199.965	9.42113	Stored	61.7515		0.563544	0.0731329	0.0618624	0.00691018	0.264054	0.030496	0.447252	0.037367	0.0587625	0.0552931	0.191097	0.0265334	0.0862043	0.0804925	0.016998
94	608	22	5	60-63	201.515	9.5141	Stored	60.0445		0.475897	0.0729836	0.0744427	0.00871693	0.329871	0.038089	0.423631	0.0303495	0.057824	0.0753218	0.164356	0.0261904	0.133716	0.0779368	0.0106756
94	608	23	2	20-23	206.215	9.71775	Stored	79.6729		0.417379	0.070819	0.0851371	0.0102403	0.368275	0.0481499	0.547286	0.0318526	0.0418808	0.103106	0.0989367	0.0133006	0.111301	0.0451213	0.00721491
94	608	23	3	30-33	207.815	9.787	Stored	74.0203		0.44066	0.0828376	0.0864921	0.00741758	0.342891	0.0397014	0.484733	0.0368003	0.0442405	0.0623036	0.175325	0.0211725	0.101126	0.0495534	0.0247457
94	608	23	3	127-130	208.785	9.83566	Stored	72.5615		0.448446	0.0738668	0.0820551	0.00945089	0.34474	0.0414411	0.543182	0.0358538	0.0541001	0.0697786	0.108973	0.0195995	0.113588	0.0420254	0.0128994
94	608	23	4	35-38	209.365	9.86476	Stored	66.3104		0.492912	0.0749328	0.0680415	0.00837329	0.317432	0.0383079	0.504303	0.0377792	0.043821	0.0799912	0.126349	0.0213066	0.120538	0.0535055	0.0124063
94	608	23	5	35-38	210.865	9.94106	Stored	74.5052		0.542419	0.0812845	0.0757179	0.00715748	0.262807	0.0306142	0.571703	0.0252275	0.0312303	0.138407	0.0610211	0.0171219	0.0971894	0.0415996	0.0165004
94	608	23	7	35-38	213.865	10.0822	Stored	69.3738		0.558715	0.0598754	0.0687451	0.00734575	0.27207	0.0332491	0.685188	0.0264409	0.0236583	0.0704366	0.0590652	0.0107122	0.0875096	0.0251182	0.0118707
94	608	24	1	52-55	214.635	10.1142	Stored	75.0801		0.539196	0.0790511	0.0703076	0.0081145	0.271298	0.0320329	0.597556	0.0203605	0.0370012	0.0837661	0.0576882	0.0156077	0.142037	0.033505	0.0124784
94	608	24	1	93-97	215.045	10.1312	New	79.5374		0.514264	0.070594	0.071998	0.00793722	0.298285	0.0369221	0.307405	0.0600913	0.108009	0.109187	0.154436	0.0445558	0.140724	0.075581	0
94	608	24	2	53-56	216.145	10.1769	Stored	57.17		0.537338	0.0609846	0.0755957	0.00853748	0.2803	0.0372439	0.560667	0.104722	0	0.246128	0	0	0.0884828	0	0
94	608	24	3	57-60	217.685	10.2409	Stored	65.5787		0.48286	0.0714486	0.078092	0.00909761	0.319123	0.039379	0.521361	0.0419836	0.0551412	0.0977144	0.0972995	0.0159342	0.128885	0.0275744	0.0141076
94	608	24	4	55-58	219.165	10.3024	Stored	68.7535		0.480585	0.0739673	0.0762629	0.00909491	0.320679	0.0394106	0.548242	0.0372452	0.0367369	0.0991224	0.107198	0.020769	0.103801	0.0349089	0.0119764
94	608	24	5	53-56	220.645	10.3638	Stored	81.2147		0.398291	0.0944429	0.0906935	0.00971404	0.363757	0.0431013	0.460735	0.0414878	0.0429779	0.103429	0.114744	0.0342785	0.12508	0.042001	0.0352679
94	608	24	6	53-56	222.145	10.4261	Stored	80.1034		0.422958	0.0962261	0.0895727	0.0108375	0.339463	0.0409427	0.395683	0.0493589	0.0379445	0.113953	0.0894856	0.0258774	0.206189	0.0685368	0.0129716
94	608	24	7	28-31	223.395	10.4781	Stored	60.3833		0.413698	0.0884749	0.0900784	0.0102446	0.347061	0.0504425	0.301611	0.0333033	0.0679849	0.136702	0.16442	0.028358	0.168785	0.0849448	0.0138919
94	608	25	1	76-79	224.475	10.5229	Stored	82.7535		0.459972	0.0766987	0.0866618	0.01054	0.32655	0.0395782	0.469442	0.0397057	0.0681987	0.0942077	0.120092	0.0369336	0.133627	0.0377939	0
94	608	25	2	78-81	225.995	10.586	Stored	78.4953		0.377503	0.0868973	0.0908992	0.0112901	0.386908	0.0465024	0.459498	0.0405243	0.0487513	0.127894	0.0898952	0.0171529	0.129829	0.0627569	0.023699
94	608	25	3	76-79	227.475	10.6475	Stored	78.6973		0.351888	0.0866037	0.101901	0.0114461	0.397878	0.0502838	0.424494	0.039648	0.0437617	0.12805	0.111451	0.0310216	0.152774	0.0350588	0.0337406
94	608	25	5	67-70	230.385	10.7684	Stored	72.5968		0.37156	0.0807578	0.0958053	0.0107546	0.390475	0.0506472	0.33279	0.0327541	0.036027	0.134311	0.0956564	0.0240277	0.204776	0.0943764	0.0452816
94	608	25	6	77-80	231.985	10.8348	Stored	66.5979		0.381529	0.0993729	0.0976769	0.00975216	0.364656	0.0470128	0.533899	0.0236131	0.0277195	0.0896948	0.107639	0.012516	0.117665	0.0653113	0.0219424
94	608	26	1	55-58	233.865	10.9129	Stored	66.3605		0.415599	0.0883844	0.0930755	0.0113618	0.347913	0.0436663	0.417984	0.0296644	0.0398983	0.172039	0.0644451	0.0168728	0.189601	0.0364419	0.0330535
94	608	26	2	50-53	235.315	10.9731	Stored	68.6968		0.453032	0.0779666	0.0887853	0.00981916	0.325216	0.0451811	0.323476	0.032089	0.050426	0.181815	0.0959869	0.022184	0.177565	0.0630945	0.0533638
94	608	26	2	53-57	235.325	10.9736	New	46.3385		0.392545	0.0774433	0.0991309	0.00861173	0.363521	0.0587484	0.355046	0.0291828	0.0463399	0.118752	0.0713281	0.013969	0.306721	0.0364385	0.0222224
94	608	26	3	50-53	236.815	11.0354	Stored	58.1341		0.449737	0.0830514	0.0867998	0.00889345	0.330617	0.0409014	0.288017	0.0453079	0.0440161	0.183718	0.101723	0.0132242	0.247237	0.0368321	0.0399248
94	608	26	4	21-25	238.045	11.1695	New	61.9488		0.596767	0.082699	0.0620918	0.00781926	0.221721	0.0289016	0.372695	0.0250232	0.0349874	0.173059	0.0662775	0.0111393	0.234814	0.040696	0.0413082
94	608	26	4	54-57	238.355	11.1888	Stored	70.7387		0.6735	0.0693902	0.0551014	0.00686599	0.173176	0.0219668	0.377365	0.0273354	0.0486811	0.240868	0.0800453	0.0175013	0.132762	0.0464444	0.0289984
94	608	26	5	53-56	239.845	11.2494	Stored	50.0813		0.491537	0.0678405	0.0847861	0.00792264	0.307461	0.0404527	0.322537	0.0349293	0.0471872	0.235594	0.0866379	0.0195028	0.169705	0.0569047	0.0270022
94	608	27	1	51-53	243.42	11.3947	Stored	62.5814		0.46646	0.0766901	0.086514	0.0088725	0.323652	0.0378114	0.276577	0.0407612	0.0560806	0.263944	0.0914904	0.0174085	0.18742	0.0413842	0.0249349
94	608	27	2	46-49	244.875	11.4538	Stored	47.5242		0.48168	0.0793195	0.0751959	0.00885433	0.319482	0.0354685	0.211758	0.0391056	0.084648	0.238872	0.137253	0.0233594	0.176441	0.0700549	0.0185089
94	608	27	3	54-57	246.455	11.518	Stored	60.7729		0.498045	0.0663514	0.072519	0.00815729	0.316252	0.0386751	0.291648	0.0401679	0.0768751	0.232611	0.130879	0.0259245	0.124356	0.0588191	0.0187201
94	608	27	4	53-56	247.945	11.5786	Stored	60.1334		0.45871	0.0817903	0.0815946	0.00979094	0.32761	0.0405042	0.263964	0.0367447	0.0646628	0.212314	0.140701	0.0237052	0.162754	0.0755277	0.0196274
94	608	27	5	50-53	249.415	11.6221	Stored	42.7146		0.433891	0.0718015	0.08081	0.00828494	0.355429	0.0497841	0.321395	0.0203702	0.0297333	0.314891	0.0703075	0.0163269	0.179916	0.0334876	0.0135729
94	608	27	6	56-59	250.975	11.733	Stored	48.6941		0.434365	0.0822773	0.0827946	0	0.358947	0.0416161	0.233733	0.0413319	0.0483265	0.30704	0.099672	0	0.212468	0.0574286	0
94	608	28	1	53-56	253.045	11.9306	Stored	50.6238		0.436154	0.0861893	0.0869784	0.0104211	0.340817	0.0394402	0.23976	0.0403404	0.051257	0.263369	0.110957	0.0187631	0.221628	0.0390157	0.014909
94	608	28	2	47-50	254.485	11.965	Stored	39.8037		0.423211	0.0836626	0.0842585	0.00831146	0.357891	0.0426659	0.288849	0.0306504	0.0236106	0.305168	0.0821731	0.00983264	0.204562	0.0334648	0.0216892
94	608	28	3	53-56	256.045	12.0023	Stored	43.5972		0.38982	0.0835506	0.0915864	0.0105205	0.375881	0.0486416	0.41227	0.0238131	0.0253038	0.252963	0.0666045	0.00872321	0.171868	0.0274115	0.0110428
94	608	28	4	50-53	257.515	12.0374	Stored	42.5569		0.509894	0.0705672	0.0775582	0.00730954	0.293761	0.0409098	0.295307	0.0146281	0.0147452	0.362043	0.0491951	0.00988499	0.21763	0.0261216	0.0104453
94	608	28	5	50-53	259.015	12.1077	Stored	53.9563		0.394388	0.0849579	0.104705	0.00910381	0.361129	0.0457171	0.3185	0.0266278	0.0344425	0.242271	0.0738242	0.0111854	0.247214	0.0330713	0.0128629
94	608	29	2	42-46	264.035	12.2769	New	30.0368		0.393154	0.0671927	0.0655166	0.00953983	0.420615	0.0439827	0.175288	0.0246786	0.0415577	0.100129	0.199566	0.0186613	0.310938	0.108736	0.0204445
94	608	29	2	50-53	264.115	12.2802	Stored	38.8338		0.342525	0.0694846	0.0766262	0.0106696	0.449151	0.051544	0.162841	0.0249699	0.0411008	0.183157	0.150063	0.0198135	0.311933	0.0860062	0.0201162
94	608	29	3	54-57	265.655	12.3436	Stored	19.9236		0.458278	0.0638526	0.067675	0.00858649	0.361201	0.0404075	0.145256	0.0532901	0.0653151	0.123791	0.241261	0.0184446	0.239016	0.102337	0.0112893
94	608	29	5	56-59	268.675	12.4678	Stored	41.9958		0.408253	0.0834193	0.0891597	0.0120155	0.36249	0.0446624	0.343342	0.0243992	0.0448547	0.246959	0.084338	0.0190517	0.162321	0.052257	0.0224776
94	608	29	6	53-56	270.145	12.5179	Stored	41.911		0.416288	0.0857048	0.0860617	0.0109969	0.355576	0.0453723	0.381369	0.0265943	0.0331821	0.229692	0.0662445	0.0212473	0.170818	0.0405878	0.0302647
94	608	30	1	54-57	272.255	12.5881	Stored	51.4835		0.392215	0.0794182	0.0877326	0.0114788	0.383569	0.0455872	0.398936	0.0399872	0.0746624	0.146535	0.110114	0.025158	0.142196	0.0464479	0.0159629
94	608	30	2	57-60	273.785	12.639	Stored	50.5512		0.426074	0.0742308	0.0840263	0.00892841	0.361055	0.0456854	0.364556	0.036212	0.0748245	0.121414	0.146849	0.0240558	0.155982	0.0635259	0.0125812
94	608	30	3	30-34	275.015	12.6799	New	44.7982		0.421674	0.0709874	0.0813193	0.00843163	0.372382	0.0452062	0.240031	0.0428866	0.0664619	0.135415	0.185488	0.00142049	0.201452	0.102316	0.0245291
94	608	30	4	50-53	276.715	12.7364	Stored	62.8865		0.573432	0.0949519	0.0588919	0.00766285	0.236557	0.028505	0.217158	0.0274374	0.048431	0.0685454	0.233396	0.0210289	0.250582	0.120301	0.0131193
94	608	30	5	50-53	278.215	12.7769	Stored	49.0216		0.451707	0.0810245	0.0766576	0.00915139	0.338375	0.0430836	0.334831	0.0349315	0.0635113	0.0981486	0.164327	0.0293712	0.19018	0.0671742	0.0175255
94	608	31	2	20-24	283.025	12.9071	New	36.8574		0.468071	0.0734934	0.0640302	0.00847104	0.346986	0.0389487	0.175505	0.0418426	0.070335	0.0917356	0.222427	0.0286197	0.265949	0.0825428	0.0210435
94	608	31	3	54-57	284.855	12.9829	Stored	55.709		0.43667	0.102096	0.0746337	0.00927803	0.336743	0.0405793	0.425884	0.0268125	0.0503784	0.113566	0.125083	0.0269472	0.147587	0.0675357	0.0162071
94	608	31	4	52-55	286.335	13.0994	Stored	39.5019		0.454434	0.075856	0.0777303	0.00837062	0.342834	0.0407752	0.309876	0.0311327	0.0610304	0.0902156	0.166606	0.0343532	0.194595	0.0961476	0.0160436
94	608	31	6	62-65	289.435	13.326	Stored	61.052		0.379753	0.150438	0.101268	0.0148838	0.311265	0.0423929	0.386139	0.0553455	0.072556	0.0959858	0.10571	0.0346014	0.16852	0.0530341	0.0281081
94	608	32	1	52-55	291.435	13.3929	Stored	45.4937		0.354943	0.131206	0.112026	0.0117601	0.344155	0.0459099	0.243884	0.0389168	0.0641523	0.117418	0.168631	0.0242638	0.215424	0.102074	0.0252366
94	608	32	2	51-54	292.925	13.4428	Stored	58.2346		0.387258	0.121431	0.0847275	0.0105723	0.348195	0.0478159	0.386741	0.0261378	0.0450097	0.18224	0.0721177	0.0203307	0.207728	0.0373881	0.0223073
94	608	32	3	55-58	294.465	13.4943	Stored	51.9192		0.393354	0.0742346	0.0839224	0.0113679	0.390115	0.0470064	0.355435	0.0302483	0.0699071	0.166674	0.0870198	0.0330827	0.182799	0.0427359	0.0320982
94	608	32	4	52-55	295.935	13.5435	Stored	45.6386		0.437631	0.0936769	0.0826243	0.0117577	0.33119	0.0431202	0.32027	0.0222728	0.0446642	0.206647	0.0580244	0.0157485	0.248032	0.0569333	0.0274072
94	608	32	5	47-50	297.385	13.592	Stored	39.304		0.493979	0.0805617	0.0920861	0.0116941	0.285382	0.0362968	0.314262	0.0243426	0.0433238	0.189785	0.0872115	0.0138051	0.268912	0.0458363	0.0125209
94	608	33	1	54-57	301.055	13.7667	Stored	42.1619		0.456891	0.0928303	0.0758799	0.00997398	0.324702	0.0397234	0.4046	0.0234788	0.0669295	0.126698	0.0878429	0.0218305	0.193262	0.059946	0.0154125
94	608	33	1	84-87	301.355	13.7848	Stored	51.9134		0.417458	0.0797788	0.07264	0.0115435	0.374769	0.0438109	0.338288	0.0282353	0.0828657	0.106401	0.124355	0.0280967	0.198999	0.0780782	0.01468
94	608	33	2	30-33	302.315	13.8427	Stored	70.936		0.393613	0.0861924	0.0956026	0.010337	0.368661	0.0455945	0.345709	0.0557425	0.0505061	0.0963264	0.187944	0.0313055	0.127739	0.0745618	0.0301657
94	608	33	2	50-55	302.515	13.8547	Stored	77.2358		0.510756	0.0823944	0.078143	0.00957832	0.277351	0.0417779	0.417854	0.0318625	0.0761591	0.182718	0.0759429	0.0274228	0.137456	0.0349513	0.0156336
94	608	33	2	100-104	303.015	13.8849	New	60.5857		0.431836	0.0662299	0.0873617	0.00974811	0.356624	0.0482009	0.182135	0.0409709	0.0744156	0.133592	0.160983	0.0294062	0.233219	0.105501	0.0397777
94	608	33	2	145-149	303.465	13.912	New	62.1856		0.53015	0.0564207	0.0752343	0.0074318	0.288743	0.0420199	0.291556	0.0519906	0.0786778	0.157799	0.125582	0.0230962	0.17106	0.0577288	0.0425109
94	608	33	3	26-29	303.775	13.9307	New	69.9264		0.511068	0.0955044	0.104269	0.0098425	0.241612	0.0377044	0.270632	0.0387164	0.0485227	0.20359	0.118328	0.0223396	0.231506	0.066366	0
94	608	34	1	6-10	310.175	14.3167	New	36.5336		0.386172	0.0659034	0.099985	0.0106659	0.377467	0.0598074	0.321043	0.0196412	0.0283348	0.150399	0.0514168	0.00871125	0.360562	0.0385112	0.0213805
94	608	34	1	27-31	310.385	14.3293	New	51.948		0.453307	0.0689139	0.085338	0.00889192	0.333485	0.0500642	0.276663	0.0311984	0.040666	0.112727	0.0682757	0.0109364	0.32659	0.0646491	0.0682946
94	608	34	1	77-81	310.885	14.3595	New	54.1987		0.444624	0.109849	0.0963756	0.00646156	0.296118	0.0465723	0.226478	0.0313015	0.0333804	0.119938	0.0791105	0.00871177	0.477215	0.0238651	0
94	608	34	2	102-105	312.635	14.465	Stored	53.9902		0.407788	0.0689169	0.100389	0.0109814	0.352535	0.0593901	0.11119	0.0110161	0.0180833	0.0707912	0.0284698	0.00449006	0.741455	0.00757215	0.00693246
94	608	34	3	25-28	313.365	14.5091	Stored	57.0275		0.304453	0.0737605	0.120813	0.0139479	0.41825	0.0687764	0.0967059	0.0171768	0.025818	0.0583252	0.0510454	0.010577	0.699442	0.0294068	0.0115026
94	608	34	3	105-108	314.165	14.5573	Stored	55.3511		0.460074	0.0684319	0.0937868	0.0105361	0.314258	0.0529128	0.104373	0.0163264	0.0241958	0.0867847	0.0417257	0.00789706	0.686592	0.0171136	0.014991
94	608	34	4	23-26	314.845	14.5983	Stored	52.9524		0.437147	0.098228	0.093982	0.0108424	0.31167	0.0481308	0.120667	0.0444888	0.0585121	0.0921135	0.0966211	0.0196576	0.497843	0.0518679	0.0182289
94	608	34	4	100-105	315.625	14.6453	Stored	34.4647		0.355057	0.0644824	0.115198	0.0137424	0.378573	0.0729463	0.101	0.0153286	0.0247235	0.105562	0.0277873	0.00642505	0.702953	0.010478	0.0057432
94	608	34	5	28-31	316.395	14.6918	Stored	53.5193		0.373695	0.0666816	0.105323	0.0117264	0.38059	0.0619842	0.237198	0.02517	0.040824	0.12306	0.079983	0.0175836	0.398241	0.0597248	0.0182159
94	608	34	5	100-103	317.115	14.7352	Stored	25.0364		0.339273	0.0642518	0.119555	0.0127687	0.394304	0.0698467	0.14182	0.00679332	0.00787639	0.2042	0.0127772	0.00336879	0.606711	0.0124957	0.00395703
94	608	34	6	21-24	317.825	14.7792	Stored	52.6936		0.29601	0.073132	0.122111	0.0138837	0.423647	0.071217	0.107381	0.0120461	0.0247742	0.12018	0.0727459	0.00649144	0.57891	0.0656089	0.0118616
94	608	34	6	92-95	318.535	14.8388	Stored	45.3726		0.360644	0.0675823	0.112248	0.0114054	0.380475	0.0676455	0.111825	0.0286595	0.0225178	0.16849	0.044442	0.0192139	0.542792	0.0444749	0.0175844
94	608	35	1	109-114	320.815	15.0301	Stored	35.9103		0.356115	0.0648644	0.111143	0.0111359	0.389834	0.0669077	0.105328	0.0264055	0.00997622	0.151929	0.0640034	0.0210984	0.31784	0.0630074	0.240412
94	608	35	1	131-135	321.035	15.0486	New	40.9469		0.380064	0.0623257	0.106248	0.00995234	0.381691	0.0597188	0.122349	0.0335823	0.0249962	0.105045	0.0764916	0.0184909	0.32425	0.0535187	0.241277
94	608	35	3	110-116	323.83	15.4429	Stored	72.3363		0.392627	0.0649771	0.109827	0.0113102	0.362178	0.0590811	0.141329	0.0310281	0.0171293	0.126358	0.0458222	0.0220947	0.442689	0.058346	0.115204
94	608	35	4	60-66	324.83	15.5691	Stored	78.0819		0.503326	0.0646638	0.0888426	0.00859422	0.292137	0.042436	0.190936	0.0259492	0.0466908	0.111788	0.074737	0.0332526	0.293567	0.105058	0.118021
94	608	35	6	10-16	327.33	15.7488	Stored	64.7634		0.381957	0.0727495	0.107489	0.0112967	0.372281	0.0542271	0.13538	0.0691262	0.0704702	0.114475	0.10461	0.0407738	0.274743	0.0703321	0.12009
94	608	35	6	80-84	328.03	16.0547	New	68.9304		0.371787	0.066485	0.103623	0.0109151	0.38906	0.0581295	0.137325	0.0637819	0.0532516	0.0895168	0.102614	0.038407	0.325747	0.0501202	0.139237
94	608	35	6	110-116	328.33	16.0613	Stored	75.3737		0.384239	0.0600308	0.110483	0.0121402	0.365195	0.0679125	0.129443	0.0390716	0.0405948	0.0995083	0.0817796	0.0334895	0.301632	0.097065	0.177416
94	608	35	CC	10-16	328.57	16.0665	Stored	67.4522		0.432468	0.0699435	0.0963785	0.0124173	0.333141	0.0556522	0.156974	0.0617085	0.110874	0.0845404	0.150507	0.0354993	0.260369	0.089335	0.050193
94	608	36	1	125-131	330.58	16.1107	Stored	82.2236		0.407673	0.0683343	0.109147	0.0129159	0.346811	0.0551186	0.256053	0.043575	0.0750002	0.11156	0.0983657	0.0205517	0.312339	0.0513046	0.0312514
94	608	36	2	73-79	331.56	16.1323	Stored	47.5991		0.382614	0.0753695	0.108961	0.0111317	0.36781	0.0541136	0.0801106	0.0535043	0.139611	0.0316855	0.142741	0.1927	0.117718	0.187347	0.0545832
94	608	36	3	91-96	333.235	16.3165	Stored	75.3776		0.37418	0.0700062	0.113857	0.0131411	0.371333	0.0574822	0.150762	0.0367755	0.0539778	0.0819338	0.0800698	0.023378	0.252071	0.0719561	0.249076
94	608	36	3	120-126	333.53	16.4278	Stored	66.9016		0.422193	0.0678432	0.125458	0.0145864	0.320319	0.049601	0.108286	0.04164	0.0590331	0.0969599	0.110206	0.0711144	0.182674	0.0958646	0.234221
94	608	36	4	78-84	334.61	16.6546	Stored	81.4283		0.324304	0.0661706	0.126069	0.00841187	0.404249	0.0707954	0.104451	0.0179688	0.0551727	0.112512	0.0684971	0.0289549	0.468666	0.0602492	0.0835287
94	608	36	5	120-126	336.53	16.7594	Stored	69.8163		0.389736	0.0612369	0.128801	0.00933154	0.351719	0.059175	0.0792893	0.0337779	0.0343403	0.0879294	0.0940271	0.0266413	0.218095	0.0952821	0.330618
94	608	37	1	24-30	339.17	16.844	Stored	60.7203		0.326429	0.0719949	0.154323	0.0109925	0.372965	0.0632962	0.0775032	0.0366328	0.341529	0.0834501	0.127623	0.0635374	0.125312	0.0677722	0.0766409
94	608	37	1	123-129	340.16	16.9649	Stored	54.3361		0.412491	0.0634522	0.134732	0.0133491	0.32253	0.0534462	0.0994247	0.016484	0.0424214	0.18054	0.0327954	0.015824	0.42156	0.0645158	0.126434
94	608	37	2	75-81	341.18	17.0145	Stored	88.5571		0.498706	0.0501206	0.127936	0.0122134	0.263165	0.0478593	0.171069	0.0935474	0.0448627	0.160471	0.122077	0.0324962	0.24757	0.0434381	0.0844677
94	608	37	3	24-30	342.17	17.112	Stored	73.4454		0.32565	0.0746516	0.199551	0.011274	0.326708	0.0621649	0.230011	0.0245905	0.0162984	0.137715	0.170076	0.0359	0.0733104	0.177625	0.134473
94	608	37	3	111-115	343.04	17.112	New	77.6453		0.278125	0.077445	0.20451	0.0100178	0.374976	0.0549266	0.461061	0.0290747	0	0.215951	0.0582221	0	0.235691	0	0
94	608	37	5	116-122	346.09	17.3875	Stored	80.6739		0.410397	0.0680179	0.137665	0.0118151	0.318856	0.0532487	0.258454	0.0701078	0.0297136	0.219097	0.0549755	0.0507767	0.173343	0.0361625	0.10737
94	608	37	6	110-114	347.53	17.5238	New	69.5673		0.327846	0.0671591	0.16306	0.011611	0.373629	0.0566952	0.391873	0.0292835	0.0267207	0.203558	0.0596428	0	0.201639	0.037766	0.0495168
94	608	37	6	113-117	347.56	17.5266	New	74.2586		0.315212	0.0658362	0.209322	0.0150275	0.342495	0.0521069	0.424969	0.0632613	0.0238709	0.293706	0.0302191	0	0.163974	0	0
94	608	38	1	26-32	348.79	17.643	Stored	87.3563		0.338051	0.0797655	0.132941	0.0137752	0.376117	0.0593509	0.262775	0.0337553	0.0966552	0.203788	0.0759414	0.0580084	0.22959	0.0394876	0
94	608	38	2	75-81	350.78	17.7963	Stored	62.8206		0.438628	0.068532	0.145279	0.012035	0.292729	0.0427974	0.140003	0.0222458	0.165686	0.153069	0.0474387	0.0280762	0.386648	0.0308211	0.0260126
94	608	38	3	69-75	352.22	17.9015	Stored	55.3733		0.316614	0.0730878	0.153872	0.0100753	0.384054	0.0622972	0.0731722	0.00360333	0.0113805	0.157349	0.011476	0.0040593	0.692933	0.0236606	0.0223659
94	608	38	4	76-82	353.79	18.0484	Stored	66.0567		0.294436	0.0825478	0.153163	0.0103604	0.394056	0.0654363	0.179217	0.111131	0.0765222	0.162649	0.0930353	0.0522671	0.184478	0.0669574	0.0737431
94	608	38	5	28-34	354.81	18.074	Stored	66.2159		0.312814	0.0741192	0.135877	0.0127566	0.39582	0.0686124	0.130177	0.0139197	0.0176952	0.237581	0.0336	0.00838644	0.447016	0.055706	0.055919
94	608	38	5	126-132	355.79	18.1416	Stored	82.0646		0.590822	0.0462721	0.0933559	0.0169771	0.216606	0.0359671	0.269194	0.0998613	0.0967401	0.1522	0	0	0.382005	0	0
94	608	38	6	76-82	356.79	18.2231	Stored	72.391		0.354172	0.0713525	0.113446	0.010205	0.388941	0.061883	0.127008	0.040723	0.0156836	0.176419	0.0298985	0.0136981	0.553789	0.0355217	0.00725892
94	608	39	1	17-23	358.3	18.3462	Stored	79.5408		0.372241	0.0633477	0.115168	0.0117441	0.373808	0.0636907	0.13082	0.023041	0.0378424	0.279749	0.0334276	0	0.431054	0.0209133	0.0431529
94	608	39	1	126-132	359.39	18.435	Stored	70.555		0.372106	0.0737007	0.133425	0.0134569	0.350896	0.0564154	0.126405	0.0244677	0.0207048	0.194031	0.0543691	0.0283568	0.459864	0.0444538	0.0473469
94	608	39	2	77-83	360.4	18.5173	Stored	73.6192		0.427643	0.0684005	0.125435	0.0147299	0.311348	0.0524439	0.115355	0.0303558	0.114437	0.222659	0.0684898	0.0526974	0.282544	0.0450184	0.068443
94	608	39	3	21-27	361.34	18.5939	Stored	63.5301		0.489901	0.0758587	0.109452	0.0101433	0.268565	0.0460794	0.143712	0.0189061	0.0270808	0.284029	0.0590214	0.0318379	0.312976	0.0529031	0.0695341
94	608	39	3	125-131	362.38	18.6787	Stored	60.2222		0.644577	0.0458431	0.0672225	0.00687622	0.200525	0.0349564	0.163799	0.0154284	0.0264051	0.213877	0.0537373	0.0236684	0.37591	0.0542934	0.0728824
94	608	39	4	74-80	363.37	18.7736	Stored	99.9681		0.32412	0.0926538	0.302127	0.035752	0.209013	0.0363341	0	0	0	0	0	0	0	0	0
94	608	39	CC	31-35	364.31	18.8715	New	56.7112		0.312991	0.0816612	0.208437	0.0152275	0.333715	0.0479686	0.369575	0.0612593	0.0932309	0.118234	0.0723219	0.0517917	0.129951	0.0613518	0.0422853
94	608	40	1	25-31	367.98	19.1465	Stored	67.5476		0.495146	0.0636497	0.205238	0.0174682	0.19233	0.0261677	0.210277	0.0177889	0.0511501	0.252025	0.0528373	0.0247787	0.314792	0.0307147	0.0456358
94	608	40	2	78-84	370.01	19.2965	Stored	63.1848		0.371441	0.0672018	0.194994	0.0154343	0.299716	0.0512125	0.211926	0.0454855	0.159438	0.173205	0.116527	0.058433	0.154869	0.046716	0.0334005
94	608	40	3	25-31	370.98	19.3682	Stored	60.2473		0.4163	0.0705932	0.131943	0.0176086	0.317688	0.0458664	0.135206	0.0366311	0.112309	0.300154	0.124654	0.0486849	0.162314	0.05357	0.026477
94	608	40	3	129-135	372.02	19.445	Stored	67.6531		0.367106	0.0876099	0.171752	0.0256049	0.29576	0.0521669	0.149537	0.0260412	0.0152376	0.257064	0.0364096	0.0268464	0.396218	0.043897	0.0487496
94	608	40	4	76-82	372.99	19.5167	Stored	83.1536		0.325679	0.0744857	0.121231	0.0167214	0.397427	0.0644557	0.550666	0	0	0.340702	0	0	0.108632	0	0
94	608	40	4	115-120	373.375	19.5451	Stored	99.9963		0.593687	0.0444525	0.0805629	0.00887251	0.235052	0.0373731	0	0	0	0	0	0	0	0	0
94	608	40	5	25-31	373.98	19.5898	Stored	83.4468		0.396585	0.0676029	0.132739	0.016871	0.330618	0.0555838	0.420885	0	0	0.428963	0	0	0.150152	0	0
94	608	40	CC	8-14	376.07	19.71	Stored	79.688		0.527004	0.0582804	0.0839345	0.00873656	0.278946	0.0430985	0.278056	0.0468419	0.0290472	0.324937	0.0521667	0.053573	0.13192	0.060548	0.0229101
94	608	41	3	25-31	380.58	19.8159	Stored	68.1366		0.414526	0.0667902	0.102193	0.00649813	0.354386	0.0556068	0.291606	0.0244943	0.0336297	0.295558	0.0385286	0.0230753	0.241854	0.029294	0.0219594
94	608	41	4	120-124	382	19.8492	New	68.1734		0.498137	0.0604812	0.0841019	0.00915553	0.304033	0.0440911	0.236172	0.0426168	0.0882414	0.161664	0.104401	0.0343447	0.183137	0.061736	0.0876872
94	608	41	4	79-84	382.615	19.8637	Stored	86.4887		0.451073	0.0656049	0.0944596	0.0105138	0.32831	0.0500382	0.397271	0.0500728	0.082699	0.172308	0.0532103	0.0212365	0.186717	0.0167636	0.0197221
94	608	41	5	26-32	383.59	19.8866	Stored	73.5826		0.701919	0.0531084	0.0539427	0.00689146	0.159545	0.0245935	0.601824	0.0294526	0.0437939	0.0536683	0.0826107	0.0239145	0.115655	0.0315916	0.0174895
94	608	41	5	70-74	384.03	19.8969	New	80.8581		0.628318	0.0456747	0.0637977	0.00716751	0.223028	0.0320141	0.340528	0.0640827	0.109069	0.135474	0.112188	0.0359044	0.130197	0.00631132	0.0662452
94	608	41	5	124-130	384.57	19.9096	Stored	66.7187		0.573492	0.0562518	0.0703641	0.0087931	0.254594	0.0365047	0.327272	0.0498853	0.068303	0.176301	0.117544	0.0276669	0.138767	0.0592814	0.0349792
94	608	41	6	76-82	385.59	19.9335	Stored	70.669		0.669341	0.0585342	0.0644914	0.0101789	0.169451	0.0280032	0.393836	0.0524804	0.0809813	0.10186	0.0937085	0.0271541	0.195052	0.0344304	0.0204965
94	608	41	6	120-124	386.03	19.9439	New	86.6646		0.73695	0.0390733	0.0439589	0.00526227	0.153184	0.0215717	0.268796	0.062965	0.106259	0.129088	0.125318	0.0415281	0.15558	0.0667932	0.043673
94	608	41	7	24-30	386.57	19.9565	Stored	70.5067		0.456223	0.0682087	0.0922638	0.0112179	0.322502	0.0495855	0.400297	0.0468645	0.0657202	0.0950687	0.081668	0.034228	0.205999	0.0339601	0.0361946
94	608	42	1	25-31	387.18	19.9709	Stored	72.9981		0.474303	0.0580196	0.0912381	0.00892449	0.313688	0.0538272	0.579383	0.0150684	0.0369989	0.0825001	0.0376151	0.0235984	0.139058	0.0670256	0.0187524
94	608	42	1	129-135	388.22	19.9953	Stored	79.5097		0.340117	0.0722422	0.111163	0.0134149	0.400401	0.0626616	0.505901	0.0306852	0.042723	0.0989822	0.0467679	0.0270631	0.192685	0.0462165	0.00897638
94	608	42	2	67-73	389.1	20.016	Stored	83.4538		0.707519	0.0353003	0.0478821	0.00619375	0.1766	0.026505	0.371772	0.0325654	0.0710899	0.136074	0.0553532	0.0234009	0.279524	0.0188365	0.0113847
94	608	42	3	100-105	390.925	20.3557	Stored	77.0098		0.363634	0.0712447	0.112834	0.0128549	0.376837	0.0625957	0.412203	0.0396516	0.0639022	0.19327	0.0869966	0.0184227	0.150982	0.0254049	0.00916711
94	608	42	4	79-85	392.22	20.653	Stored	68.6676		0.345053	0.0733758	0.107367	0.0122739	0.399294	0.062637	0.371013	0.0423691	0.0742637	0.16128	0.0926153	0.0283899	0.19167	0.0288598	0.00953961
94	608	42	5	26-32	393.19	20.8758	Stored	59.1634		0.349433	0.0656134	0.112968	0.015598	0.388538	0.0678488	0.404709	0.0280498	0.0438609	0.234226	0.0631354	0.0155271	0.163963	0.0304923	0.0160368
94	608	43	1	25-31	396.78	21.2328	Stored	66.4348		0.340104	0.071336	0.112167	0.0147092	0.391805	0.0698792	0.486086	0.0155204	0.030959	0.240494	0.0539844	0.0142569	0.1587	0	0
94	608	43	1	125-131	397.78	21.2806	Stored	56.7104		0.358793	0.0714503	0.103092	0.0138457	0.392728	0.0600906	0.392435	0.0249823	0.0436845	0.26408	0.0543083	0.0356849	0.122743	0.0434113	0.0186717
94	608	43	2	71-77	398.74	21.3265	Stored	60.997		0.339837	0.0730199	0.11328	0.0120549	0.397666	0.0641421	0.412467	0.0344565	0.0678771	0.173312	0.0574746	0.0190959	0.177903	0.0348984	0.0225158
94	608	43	3	25-31	399.78	21.3762	Stored	69.3741		0.464034	0.0642165	0.092285	0.0121467	0.316978	0.0503393	0.319768	0.0462401	0.050198	0.137786	0.0933559	0.0230278	0.257147	0.0411599	0.0313179
94	608	43	3	126-131	400.785	21.4242	Stored	48.8899		0.355397	0.0697319	0.108999	0.0146537	0.38829	0.0629283	0.438239	0.0172993	0.0197376	0.276688	0.04293	0.00484507	0.170188	0.0156488	0.0144239
94	608	43	4	66-72	401.69	21.4675	Stored	61.0176		0.471042	0.0649704	0.0889227	0.0113355	0.316755	0.0469739	0.229866	0.0424027	0.074988	0.144091	0.100359	0.0145805	0.307546	0.0516084	0.0345592
94	608	43	5	30-36	402.83	21.5219	Stored	33.4779		0.381034	0.0724591	0.0987213	0.0153415	0.377844	0.0546001	0.322736	0.00903113	0.0128099	0.260321	0.0748476	0.00506718	0.254855	0.0447653	0.0155659
94	608	43	CC	10-16	403.85	21.5707	Stored	41.4671		0.50387	0.0746623	0.0856773	0.0103776	0.279635	0.0457779	0.527928	0.0131611	0.0170827	0.206077	0.0392617	0.00962133	0.1441	0.0310379	0.0117309
94	608	44	2	8-13	407.705	21.7549	Stored	46.4941		0.363472	0.0813063	0.10194	0.0132789	0.383208	0.0567941	0.572741	0.0232174	0.0286813	0.152225	0.0582361	0.0122712	0.132061	0.0147678	0.0057987
94	608	44	2	16-19	407.775	21.7583	Stored	52.4492		0.503189	0.0807741	0.0836684	0.0132186	0.278893	0.040257	0.550158	0.0237112	0.025583	0.180765	0.0571111	0.0124608	0.117221	0.026754	0.00623629
94	608	44	3	14-20	409.27	22.2292	Stored	33.4762		0.395497	0.0703793	0.100167	0.013823	0.367946	0.0521874	0.368167	0.00686864	0.00735041	0.286966	0.0198143	0.0032649	0.296942	0.00580363	0.00482349
94	608	44	3	118-124	410.31	22.6785	Stored	48.5216		0.419647	0.0694122	0.0950784	0.0150956	0.34557	0.0551971	0.464229	0.0060699	0.00986481	0.265123	0.0129695	0.001188	0.224749	0.00784044	0.00796686
94	608	44	4	62-68	411.25	23.0845	Stored	43.4266		0.42111	0.0670595	0.0900378	0.0102285	0.357167	0.0543975	0.619974	0.0117689	0.0219911	0.189574	0.041479	0	0.0845168	0.0306963	0
94	608	45	1	5-9	415.78	23.5088	New	45.0786		0.530704	0.0562378	0.0700163	0.00973905	0.291535	0.0417674	0.206921	0.0259487	0.0235898	0.264647	0.0806248	0.0121196	0.33726	0.0326734	0.016216
94	608	45	1	8-12	415.81	23.5113	New	44.5629		0.500785	0.0563189	0.0712884	0.0104963	0.316749	0.0443621	0.23431	0.0225192	0.019899	0.264751	0.056886	0.00952346	0.35788	0.0249589	0.00927337
94	608	45	2	26-32	417.49	23.6545	Stored	59.8768		0.296122	0.0713414	0.12033	0.0159999	0.428017	0.0681897	0.204691	0.0208947	0.0167933	0.180843	0.0794011	0.0202118	0.199252	0.10665	0.171263
94	608	45	3	80-86	419.53	23.8284	Stored	60.479		0.253766	0.0741611	0.112797	0.0208633	0.462748	0.0756646	0.148552	0	0	0.313155	0.0552155	0.0266535	0.303159	0.0533821	0.0998822
94	608	45	4	115-121	421.38	23.9861	Stored	57.3967		0.254495	0.0739054	0.127416	0.0174991	0.454887	0.0717977	0.14319	0.0197681	0.00808764	0.377781	0.0178573	0.0246305	0.387366	0.0137595	0.00755973
94	608	45	5	77-83	422.5	24.0816	Stored	23.7849		0.307606	0.0658657	0.121001	0.0165297	0.422648	0.0663485	0.236739	0.00621073	0.00223398	0.426821	0.0219148	0.00617395	0.21333	0.0247229	0.0618544
94	608	45	6	27-33	423.5	24.1668	Stored	5.6508		0.34501	0.0748063	0.120605	0.0138628	0.379612	0.0661032	0.122078	0.0381421	0.00504983	0.253178	0.0448172	0.0278839	0.433483	0.0173018	0.0580662
94	608	45	6	130-136	424.53	24.2546	Stored	61.6004		0.328961	0.0680159	0.116786	0.0114996	0.406313	0.0684246	0.222054	0	0	0.531615	0	0	0.246332	0	0
94	608	48	1	3-7	444.53	25.9594	New	55.9328		0.45196	0.0569876	0.137513	0.0107273	0.299493	0.0433184	0.253097	0	0	0.443171	0.0201031	0	0.275861	0.00776872	0
94	608	48	2	10-14	446.1	26.0932	New	67.8051		0.648188	0.0413183	0.0853063	3.95941e-05	0.173113	0.0520344	0.444687	0	0	0	0	0	0.181966	0	0
94	608	48	4	10-14	449.1	26.349	New	47.8431		0.349754	0.0596295	0.170137	0.0207397	0.347144	0.0525955	0.397311	0.0595369	0	0.390307	0	0	0.152845	0	0
94	608	48	6	103-107	453.03	26.684	New	52.153		0.406626	0.0641767	0.106659	0.0118626	0.360066	0.0506098	0.241064	0.145082	0.0158558	0.212679	0.131108	0.0524428	0.0918573	0.0318787	0.0780325

## Sheet: DR12. GDGT Indices
Table DR2: GDGT Indices
Leg	Site	Core	Section	Interval (cm)	Depth (mbsf)	Sample Weight (g)	Stored/New	Age (Ma, GTS12)	Uk'37	Uk'37 SST (°C)	TEX86 INDEX	Bayspar 2.5th Percentile, SST (°C)	Bayspar 16th Percentile, SST (°C)	Bayspar 50th Percentile, SST (°C)	Bayspar 84th Percentile, SST (°C)	Bayspar 97.5th Percentile, SST (°C)	TEX86H SST (°C)	BIT INDEX	METHANE INDEX	RING INDEX	RI-TEX	Δ Ring Index	GDGT2/GDGT3	isoGDGT Abundance ( μg/g dry sediment)	brGDGT Abundance (μg/gram dry sediment)	Crencharcheol Abundance (μg/gram dry sediment)	GDGT-0 Abunance (μg/gram dry sediment)
94	608	21	5	52-55	191.835	35.6399	Stored	8.92358	0.902	25.6142	0.609003	15.3	19	22.7	26.4	30.6	23.868	0.590883	0.296118	1.67778	2.3524	0.674628	10.0277	3.44461	2.10139	1.11761	1.68185
94	608	22	1	79-82	195.705	43.5612	Stored	9.20486	0.932324	26.5201	0.606521	15.1	18.9	22.6	26.2	30.5	23.7467	0.69163	0.307081	1.51103	2.3443	0.833273	10.2934	2.91783	2.75473	0.844922	1.56191
94	608	22	2	104-107	197.455	54.8767	Stored	9.29289			0.591666	13.7	17.9	21.6	25.2	29.2	23.01	0.552138	0.296423	1.74155	2.29665	0.555091	8.12821	1.62545	0.974162	0.548291	0.760777
94	608	22	3	105-108	198.965		Stored	9.36991			0.614535	15.6	19.5	23.1	26.8	31.2	24.1366	0.530711	0.297193	1.72868	2.37062	0.641939	8.31948
94	608	22	4	55-58	199.965	37.0164	Stored	9.42113			0.575799	12.7	16.8	20.6	24.2	28	22.2025	0.580014	0.325132	1.39579	2.24736	0.851573	8.95236	0.896308	0.555167	0.236674	0.505109
94	608	22	5	60-63	201.515	39.0182	Stored	9.5141			0.624246	16.3	20.1	23.7	27.4	31.9	24.6023	0.560681	0.297925	1.71986	2.40308	0.683217	8.54002	0.419173	0.278931	0.138273	0.199483
94	608	23	2	20-23	206.215	37.9523	Stored	9.71775			0.669605	19.6	23.1	26.7	30.7	35.8	26.686	0.345414	0.285256	1.93751	2.56299	0.625481	8.31394	2.57573	0.657152	0.948579	1.07506
94	608	23	3	30-33	207.815	42.221	Stored	9.787			0.617288	15.8	19.6	23.3	26.9	31.2	24.2694	0.398841	0.315993	1.80845	2.37976	0.571309	11.6604	0.633851	0.22247	0.217342	0.279313
94	608	23	3	127-130	208.785	38.4689	Stored	9.83566			0.642834	17.7	21.4	24.9	28.8	33.4	25.474	0.443499	0.299831	1.81105	2.46696	0.655909	8.68226	0.896452	0.338985	0.309043	0.402011
94	608	23	4	35-38	209.365		Stored	9.86476			0.6049	14.8	18.8	22.5	26.1	30.3	23.6672	0.530099	0.298465	1.6591	2.33903	0.679934	8.12602
94	608	23	5	35-38	210.865	32.4425	Stored	9.94106	0.923	26.2415	0.582673	13.3	17.3	21	24.6	28.4	22.5551	0.512467	0.358756	1.42788	2.26851	0.84063	10.5788	0.517479	0.177075	0.135997	0.28069
94	608	23	7	35-38	213.865	41.907	Stored	10.0822			0.646159	17.8	21.5	25.2	28.9	33.7	25.6272	0.577718	0.308114	1.44068	2.47863	1.03795	9.35849	2.09535	0.925027	0.570082	1.17071
94	608	24	1	52-55	214.635	36.0264	Stored	10.1142	0.810671	22.8856	0.582857	13.2	17.3	21.1	24.6	28.5	22.5644	0.501821	0.341735	1.45733	2.26908	0.811743	8.66443	1.50279	0.498793	0.407706	0.8103
94	608	24	1	93-97	215.045	33.8	New	10.1312	0.833333	23.6781	0.623401	16.1	20	23.7	27.4	31.8	24.5621	0.324637	0.309899	1.57923	2.40023	0.821	9.07093	63.2903	6.69866
94	608	24	2	53-56	216.145	35.0805	Stored	10.1769			0.665584	19.2	22.8	26.4	30.4	35.4	26.5071	0.705262	0.313658	1.50796	2.54827	1.0403	8.85457	0.227332	0.17031	0.0637211	0.122154
94	608	24	3	57-60	217.685	38.898	Stored	10.2409	0.865248	24.5162	0.63918	17.3	21.1	24.7	28.5	33.1025	25.3046	0.551615	0.306761	1.68893	2.45422	0.765288	8.58379	1.24305	0.652457	0.396684	0.600217
94	608	24	4	55-58	219.165		Stored	10.3024	0.836554	23.6589	0.627811	16.4	20.3	24	27.7	32.2	24.7715	0.515636	0.30674	1.69414	2.41515	0.721015	8.38523
94	608	24	5	53-56	220.645		Stored	10.3638			0.603101	14.7	18.7	22.4	26	30.2	23.5787	0.304722	0.323829	1.9324	2.3332	0.400793	9.33633
94	608	24	6	53-56	222.145	35.9393	Stored	10.4261			0.594972	14.2	18.1	21.8	25.4	29.4	23.1756	0.343733	0.340766	1.82951	2.30712	0.477618	8.2651	1.0253	0.254671	0.348052	0.43366
94	608	24	7	28-31	223.395	38.0662	Stored	10.4781			0.630184	16.8	20.5	24	27.8	32.4	24.8836	0.534377	0.322015	1.88938	2.42324	0.533855	8.79278	1.56242	1.02508	0.542255	0.646369
94	608	25	1	76-79	224.475		Stored	10.5229	0.961	27.3768	0.64072	17.5	21.2	24.8	28.6	33.2	25.3761	0.307964	0.322021	1.74615	2.45958	0.713424	8.2222
94	608	25	2	78-81	225.995	31.0555	Stored	10.586			0.631149	16.8	20.5	24.2	27.8	32.4	24.929	0.336803	0.303755	2.03621	2.42653	0.390325	8.05121	1.12168	0.307297	0.433987	0.423436
94	608	25	3	76-79	227.475		Stored	10.6475			0.653909	18.4	22	25.7	29.5	34.5	25.9814	0.324259	0.308512	2.11739	2.50611	0.388724	8.90264
94	608	25	5	67-70	230.385	37.6086	Stored	10.7684			0.660631	19	22.5	26.1	30	34.9	26.2852	0.393756	0.298068	2.06912	2.53027	0.461152	8.9083	1.22278	0.461565	0.477466	0.454336
94	608	25	6	77-80	231.985		Stored	10.8348			0.608482	15	19	22.7	26.3	30.6	23.8426	0.504835	0.334376	1.97066	2.3507	0.380043	10.0159
94	608	26	1	55-58	233.865	41.4221	Stored	10.9129			0.626263	16.4	20.2	23.9	27.5	31.9	24.6982	0.531821	0.329947	1.87494	2.4099	0.534959	8.19198	0.489866	0.248323	0.170431	0.203588
94	608	26	2	50-53	235.315	38.072	Stored	10.9731	0.86966	24.648	0.648407	17.9	21.7	25.3	29.1	34	25.7304	0.488954	0.322818	1.76658	2.48656	0.719974	9.04204	0.731764	0.333444	0.237981	0.331512
94	608	26	2	53-57	235.325	26.2	New	10.9736	0.919101	26.3416	0.682524	20.4	23.9	27.6	31.7	36.9	27.2537	0.713173	0.304855	1.99062	2.61104	0.620425	11.5111
94	608	26	3	50-53	236.815	36.3746	Stored	11.0354			0.621885	16.1	20	23.6	27.3	31.7	24.4898	0.610301	0.324835	1.7694	2.39513	0.625725	9.75997	1.06983	0.770447	0.353703	0.481141
94	608	26	4	21-25	238.045	29.3	New	11.1695			0.544387	10.2	14.6	18.5	22	25.5	20.5361	0.683786	0.378467	1.23283	2.15473	0.921898	7.94089
94	608	26	4	54-57	238.355	38.9951	Stored	11.1888			0.547429	10.5	14.7	18.7	22.2	25.8	20.7016	0.642072	0.402321	0.98076	2.16341	1.18265	8.02527	0.732925	0.303178	0.126925	0.493625
94	608	26	5	53-56	239.845		Stored	11.2494			0.662488	19	22.5	26.2	30.2	35.2	26.3686	0.702342	0.315754	1.65283	2.537	0.884167	10.7018
94	608	27	1	51-53	243.42	33.7072	Stored	11.3947	0.914	25.9727	0.634614	17.1	20.8	24.5	28.3	32.8	25.0917	0.573525	0.322519	1.72219	2.43843	0.71624	9.7508	1.02577	0.613325	0.331991	0.47848
94	608	27	2	46-49	244.875	41.0798	Stored	11.4538			0.601085	14.5	18.5	22.2	25.8	30	23.4792	0.684271	0.315191	1.67608	2.32669	0.650615	8.49256	0.618844	0.683322	0.19771	0.298085
94	608	27	3	54-57	246.455	30.7148	Stored	11.518			0.642701	17.6	21.3	24.9	28.8	33.4	25.4678	0.569674	0.29291	1.65557	2.4665	0.810925	8.89008	1.30345	0.841339	0.41222	0.649178
94	608	27	4	53-56	247.945	36.2029	Stored	11.5786			0.61723	15.7	19.6	23.3	26.9	31.3	24.2666	0.563925	0.319932	1.74681	2.37956	0.632755	8.33368	0.839626	0.556648	0.27507	0.385145
94	608	27	5	50-53	249.415		Stored	11.6221			0.659192	18.7	22.3	26	29.9	34.9	26.2204	0.754886	0.284214	1.87913	2.52508	0.645949	9.75385
94	608	27	6	56-59	250.975	34.5417	Stored	11.733			0.601925	14.6	18.6	22.3	25.9	30.1	23.5207	0.688573	0.291835	1.85012	2.3294	0.479281		0.0684772	0.0721501	0.0245797	0.0297441
94	608	28	1	53-56	253.045	27.0127	Stored	11.9306			0.613551	15.5	19.4	23.1	26.7	31	24.089	0.674704	0.325601	1.81244	2.36736	0.554926	8.34638	0.515454	0.502752	0.175676	0.224818
94	608	28	2	47-50	254.485	40.8026	Stored	11.965			0.617802	15.7	19.6	23.3	27	31.3	24.2941	0.771404	0.305541	1.87934	2.38147	0.502125	10.1376	1.02594	1.55155	0.367174	0.434188
94	608	28	3	53-56	256.045	28.7027	Stored	12.0023			0.643402	17.6	21.3	24.9	28.8	33.4	25.5002	0.742346	0.304267	1.99638	2.46895	0.472572	8.70551	0.876011	1.13332	0.329276	0.341486
94	608	28	4	50-53	257.515	28.887	Stored	12.0374			0.640596	17.5	21.2	24.8	28.6	33.4	25.3703	0.800814	0.317146	1.58629	2.45915	0.872851	10.6105	1.78759	2.41288	0.525125	0.911484
94	608	28	5	50-53	259.015	32.3256	Stored	12.1077			0.652501	18.3	22	25.6	29.4	34	25.9173	0.656273	0.328208	1.94906	2.50109	0.552027	11.5012	0.508019	0.43352	0.18346	0.200357
94	608	29	2	42-46	264.035	23.3	New	12.2769	0.925962	26.5547	0.639199	17.3	21.1	24.6	28.4	33	25.3055	0.764544	0.234407	2.08523	2.45429	0.369051	6.86769
94	608	29	2	50-53	264.115	41.0966	Stored	12.2802	0.912382	25.9243	0.66646	19.1	22.8	26.4	30.5	35.5	26.5461	0.697631	0.238458	2.25753	2.55147	0.293939	7.18176	1.1124	1.75211	0.499633	0.381023
94	608	29	3	54-57	265.655	40.249	Stored	12.3436			0.646288	18	21.5	25.1	29	33.7	25.6332	0.8497	0.258645	1.8314	2.47908	0.647688	7.88156	0.177141	0.711962	0.0639836	0.0811798
94	608	29	5	56-59	268.675	41.4062	Stored	12.4678	0.949	27.0183	0.636132	17.1	20.8	24.5	28.2	32.8	25.1626	0.741449	0.311948	1.9264	2.44366	0.517265	7.42039	0.475802	0.657174	0.172474	0.194247
94	608	29	6	53-56	270.145	30.8071	Stored	12.5179			0.624325	16.3	20.1	23.7	27.4	31.9	24.6061	0.752946	0.313106	1.89461	2.40335	0.508734	7.82599	0.619939	0.859241	0.220436	0.258074
94	608	30	1	54-57	272.255	28.5216	Stored	12.5881			0.645797	17.8	21.5	25.2	28.9	33.7	25.6106	0.628183	0.293902	2.00594	2.47736	0.471413	7.643	0.840147	0.791729	0.322254	0.329518
94	608	30	2	57-60	273.785	37.4079	Stored	12.639			0.651287	18.2	21.8	25.5	29.4	34.2	25.862	0.634932	0.291302	1.89603	2.49677	0.600741	9.41112	1.00624	0.984296	0.363308	0.428733
94	608	30	3	30	275.015	15.5	New	12.6799			0.655308	18.6	22.1	25.7	29.6	34.3	26.0449	0.656238	0.277937	1.92927	2.51112	0.581845	9.64455
94	608	30	3	62-65	275.335	26.5425	Stored	12.6906	0.867647	24.5878
94	608	30	4	50-53	276.715	27.0666	Stored	12.7364			0.500284	6.6	11.4	15.6	19.2	22.4	18.0264	0.572273	0.378618	1.29597	2.03572	0.739753	7.68538	1.8312	1.08071	0.433182	1.05007
94	608	30	5	50-53	278.215	37.1907	Stored	12.7769			0.614017	15.5	19.4	23	26.6	30.9	24.1115	0.656962	0.304278	1.78763	2.3689	0.581272	8.37661	1.84741	1.92115	0.625118	0.834488
94	608	31	2	20	283.025	20.4	New	12.9071			0.602617	14.7	18.6	22.3	25.9	30.1	23.5548	0.724707	0.274462	1.77071	2.33163	0.560927	7.55872
94	608	31	3	54-57	284.855	35.4728	Stored	12.9829			0.549418	10.6	14.9	18.8	22.4	26	20.8093	0.618624	0.330194	1.78848	2.16912	0.380638	8.04413	3.49632	2.77973	1.17736	1.52674
94	608	31	4	52-55	286.335	33.612	Stored	13.0994			0.625831	16.5	20.2	23.8	27.5	31.9	24.6777	0.726523	0.29686	1.79087	2.40844	0.617572	9.28609	0.909472	1.39288	0.311798	0.413295
94	608	31	6	62-65	289.435	36.2106	Stored	13.326			0.513118	7.73	12.3	16.4	20.1	23.3	18.7789	0.571463	0.429812	1.81226	2.06902	0.256767	6.8039	1.72317	1.09929	0.536363	0.654379
94	608	32	1	52-55	291.435	40.7319	Stored	13.3929			0.563958	11.8	15.9	19.8	23.3	27.2	21.5853	0.667526	0.395302	1.9508	2.21167	0.260875	9.52595	1.84046	2.20507	0.633403	0.653258
94	608	32	2	51-54	292.925	36.3623	Stored	13.4428			0.540985	9.82975	14.4	18.3	21.8	25.3	20.3498	0.615358	0.353706	1.90665	2.14509	0.238441	8.01413	0.933124	0.669229	0.324909	0.36136
94	608	32	3	55-58	294.465	25.9908	Stored	13.4943			0.657165	18.7	22.2	25.8	29.7	34.6	26.1289	0.625936	0.279446	2.02467	2.51778	0.493108	7.38238	2.13414	1.97636	0.832558	0.839471
94	608	32	4	52-55	295.935	36.8697	Stored	13.5435			0.594786	14.1	18.1	21.8	25.4	29.4	23.1663	0.735946	0.334405	1.79144	2.30653	0.515093	7.02723	0.78595	0.936166	0.260299	0.343956
94	608	32	5	47-50	297.385	36.3709	Stored	13.592			0.63487	17	20.8	24.4	28.2	32.8	25.1037	0.807049	0.364297	1.58653	2.43931	0.852778	7.8746	0.851845	1.31548	0.243101	0.420794
94	608	33	1	54-57	301.055	x	Stored	13.7667	0.928	26.3909	0.574968	12.6	16.7	20.5	24.1	27.7	22.1596	0.753764	0.329002	1.73221	2.24483	0.512614	7.60779
94	608	33	1	84-87	301.355	30.656	Stored	13.7848	0.975	27.7951	0.616029	15.6	19.5	23.2	26.9	31.3	24.2087	0.614042	0.28146	1.93401	2.37557	0.441564	6.29272	0.732732	0.67872	0.274605	0.305885
94	608	33	2	30-33	302.315	33.8545	Stored	13.8427	0.875	24.8075	0.637431	17.2975	20.9	24.6	28.3	33	25.2232	0.387718	0.316847	1.96543	2.44815	0.482724	9.24858	1.44264	0.591079	0.531843	0.56784
94	608	33	2	50-55	302.515	26.9789	Stored	13.8547	0.922	26.2117	0.611152	15.5	19.2	22.9	26.5	30.8	23.9726	0.439554	0.347711	1.54393	2.35946	0.815526	8.15832	2.4895	0.733747	0.690463	1.27152
94	608	33	2	100-104	303.015	24.1	New	13.8849			0.686916	20.7	24.2	27.8	31.9	37.2	27.4442	0.500347	0.287487	1.8895	2.62763	0.738134	8.96192
94	608	33	2	145-149	303.465	35.3	New	13.912			0.688467	20.6	24.2	27.8	32	37.4	27.5112	0.566458	0.296024	1.55224	2.63352	1.08128	10.1233
94	608	33	3	26-29	303.775	27.3908	New	13.9307			0.613843	15.5	19.4	23.1	26.7	31.1	24.1031	0.55678	0.428722	1.45083	2.36833	0.917494	10.5938
94	608	33	3	26-29	303.775	27.3908	Stored	13.9307	1	28.542
94	608	34	1	6-10	310.175	34	New	14.3167	1	28.854	0.721176	22.8	26.3	30	34.5	40.3	28.89	0.792923	0.287628	2.04697	2.76141	0.714441	9.37425
94	608	34	1	27-31	310.385	30.5	New	14.3293			0.676776	20	23.5	27.1	31.2	36.4	27.0024	0.665098	0.298419	1.80046	2.58953	0.789066	9.59725
94	608	34	1	77-81	310.885	27.6	New	14.3595			0.576295	12.7	16.8	20.6	24.2	28	22.2281	0.701535	0.382959	1.69275	2.24888	0.556133	14.9152
94	608	34	2	102-105	312.635	25.6014	Stored	14.465			0.712459	22.3	25.7	29.4	33.8	39.7	28.5288	0.690616	0.30443	1.95034	2.72663	0.776294	9.14171	0.947085	0.807093	0.333881	0.38621
94	608	34	3	25-28	313.365	27.2091	Stored	14.5091			0.734002	23.6	27.1	30.8	35.5	41.7	29.4137	0.606215	0.299794	2.30533	2.8135	0.508166	8.6617	0.94179	0.709675	0.393904	0.286731
94	608	34	3	105-108	314.165	29.8435	Stored	14.5573			0.696758	21.3	24.8	28.4	32.6	38.2	27.8668	0.692595	0.31996	1.7563	2.66526	0.908964	8.9015	0.823881	0.664583	0.258911	0.379046
94	608	34	4	23-26	314.845	25.3229	Stored	14.5983			0.608939	15.1	19	22.7	26.3	30.5	23.8648	0.669508	0.360755	1.75792	2.3522	0.594272	8.66801	0.347691	0.308919	0.108365	0.151992
94	608	34	4	100-105	315.625	45.5914	Stored	14.6453	1	28.542	0.757921	25.1	28.5	32.4	37.3	43.8	30.3663	0.820414	0.299907	2.14218	2.91356	0.771373	8.38266	0.552348	1.0208	0.209054	0.198961
94	608	34	5	28-31	316.395	27.9292	Stored	14.6918	1	28.542	0.728622	23.3	26.8	30.5	35.1	41.1	29.1952	0.633813	0.293357	2.0828	2.79152	0.708712	8.98171	1.11019	0.964183	0.422528	0.414872
94	608	34	5	100-103	317.115	24.9553	Stored	14.7352			0.758835	25.3	28.6	32.4	37.4	43.8	30.4021	0.878562	0.297515	2.19827	2.91745	0.719183	9.36315	0.842304	2.52202	0.332124	0.285771
94	608	34	6	21-24	317.825	52.2429	Stored	14.7792	1	28.542	0.739134	23.9	27.4	31.1	35.8	42.1	29.6207	0.630863	0.297059	2.33846	2.83465	0.496186	8.79528	0.539338	0.484198	0.228489	0.159649
94	608	34	6	92-95	318.535	32.4862	Stored	14.8388			0.738945	24	27.4	31.1	35.8	41.9	29.6131	0.72258	0.299107	2.11878	2.83386	0.715089	9.84169	0.650518	0.783208	0.247506	0.234605
94	608	35	1	109-114	320.815	45.8378	Stored	15.0301	1	28.542	0.74468	24.3	27.7	31.5	36.3	42.6	29.8427	0.724736	0.290647	2.14752	2.85769	0.710171	9.98063	0.571114	1.01928	0.222639	0.203382
94	608	35	1	131-135	321.035	27.2	New	15.0486	1	28.854	0.738396	24.1	27.4	31	35.9	42	29.591	0.675782	0.287975	2.07032	2.83159	0.761277	10.6756
94	608	35	3	110-116	323.83	58.7455	Stored	15.4429			0.734999	23.7	27.1	30.85	35.5	41.7	29.454	0.428605	0.306425	2.0036	2.81759	0.813995	9.71043	0.307298	0.117521	0.111297	0.120653
94	608	35	4	60-66	324.83	87.188	Stored	15.5691	1	28.542	0.683852	20.4	24	27.6	31.7	36.9	27.3114	0.364256	0.326372	1.60643	2.61604	1.00962	10.3375	0.373374	0.104809	0.109076	0.187929
94	608	35	6	10-16	327.33	94.4564	Stored	15.7488			0.703984	21.8	25.2	28.9	33.2	38.9	28.1733	0.43397	0.309905	2.02765	2.6933	0.665653	9.51509	0.544534	0.296271	0.20272	0.207989
94	608	35	6	80-84	328.03	28.3	New	16.0547	1	28.854	0.721998	22.9	26.3	30	34.5	40.3	28.9239	0.390315	0.288156	2.09523	2.76471	0.66948	9.49362
94	608	35	6	110-116	328.33	56.4206	Stored	16.0613			0.76042	25.3	28.6	32.5	37.4	44.1	30.464	0.321891	0.296631	2.04985	2.92423	0.874381	9.1006	1.08108	0.353214	0.394805	0.415393
94	608	35	cc	10-16	328.57	79.3708	Stored	16.0665			0.701596	21.6	25.1	28.8	33.1	38.6	28.0723	0.420942	0.314941	1.85512	2.684	0.828872	7.76163	0.111096	0.0536073	0.0370105	0.0480453
94	608	36	1	125-131	330.58	68.5624	Stored	16.1107	1	28.854	0.721671	22.9	26.3	30	34.6	40.4	28.9104	0.297688	0.32144	1.9331	2.7634	0.830302	8.45058	0.333371	0.0720735	0.115617	0.135906
94	608	36	2	73-79	331.56	64.9493	Stored	16.1323			0.69801	21.4	24.9	28.5	32.8	38.3	27.9201	0.407215	0.316596	2.01438	2.6701	0.655712	9.78833	0.897366	0.987894	0.330061	0.343344
94	608	36	3	91-96	333.235	44.5629	Stored	16.3165			0.724912	23.1	26.5	30.2	34.8	40.7	29.0435	0.298954	0.314795	2.0524	2.77647	0.724067	8.66425	0.34967	0.114221	0.129844	0.13084
94	608	36	3	120-126	333.53	66.9909	Stored	16.4278	1	28.542	0.736519	23.8	27.3	31	35.6	41.6	29.5154	0.374665	0.359787	1.8422	2.82385	0.981652	8.60099	0.642016	0.317627	0.20565	0.271054
94	608	36	4	78-84	334.61	77.3365	Stored	16.6546			0.75623	25.1	28.4	32.3	37.2	43.5	30.2999	0.278929	0.296955	2.24372	2.90636	0.662636	14.9871	0.680115	0.155116	0.274936	0.220564
94	608	36	5	120-126	336.53	84.9992	Stored	16.7594			0.763148	25.6	28.9	32.7	37.6	44.3	30.5704	0.321401	0.326694	1.99041	2.93593	0.945514	13.8028	0.603585	0.260948	0.212292	0.235239
94	608	37	1	24-30	339.17	77.2212	Stored	16.844			0.760501	25.2	28.7	32.5	37.5	44	30.4672	0.331783	0.352317	2.15866	2.92458	0.765914	14.0389	0.227602	0.147235	0.0848876	0.0742959
94	608	37	1	123-129	340.16	55.7898	Stored	16.9649			0.760539	25.4	28.7	32.5	37.5	44.1	30.4687	0.646383	0.36005	1.87687	2.92474	1.04787	10.0929	0.21367	0.179567	0.0689149	0.0881367
94	608	37	2	75-81	341.18	76.2636	Stored	17.0145			0.789524	27.0975	30.4	34.4	39.7	46.8	31.5798	0.221394	0.379558	1.58673	3.05158	1.46485	10.4751	0.602189	0.0778119	0.158475	0.300315
94	608	37	3	24-30	342.17	64.2998	Stored	17.112			0.785263	26.7	30.1	34.1	39.4	46.1	31.419	0.327992	0.423336	2.06307	3.03259	0.969516	17.7001	0.394018	0.142459	0.128729	0.128312
94	608	37	3	111-114	343.04	21.2	New	17.112	1	28.854	0.776751	26.4	29.7	33.6	38.8	45.3	31.0953	0.412033	0.404464	2.23613	2.995	0.758869	20.4148
94	608	37	5	104-110	345.97	45.3219	Stored	17.3761	1	28.854
94	608	37	5	116-122	346.09	89.417	Stored	17.3875			0.748777	24.6	28	31.7	36.6	42.9	30.0057	0.328418	0.36889	1.86721	2.87486	1.00764	11.6517	0.0926494	0.022195	0.0295418	0.038023
94	608	37	6	110-114	347.53		New	17.5238			0.775031	26.2	29.5	33.4	38.5	45.2	31.0294	0.482733	0.359784	2.14941	2.98746	0.838052	14.0436
94	608	37	6	113-117	347.56	33	New	17.5266			0.807661	28.2	31.5	35.6	41.1	48.3	32.2545	0.471835	0.423761	2.10797	3.13379	1.02582	13.9293
94	608	38	1	26-32	348.79	79.7217	Stored	17.643			0.720936	22.9	26.3	30	34.4	40.3	28.8801	0.211291	0.342143	2.12884	2.76044	0.631602	9.65074	0.275865	0.039928	0.103757	0.0932563
94	608	38	2	75-81	350.78	80.6852	Stored	17.7963			0.744896	24.3	27.7	31.5	36.3	42.6	29.8514	0.578814	0.402311	1.7373	2.8586	1.1213	12.0714	0.100706	0.0596014	0.0294795	0.0441724
94	608	38	3	69-75	352.22	41.133	Stored	17.9015			0.75583	25	28.4	32.2	37.1	43.4	30.2842	0.659614	0.346853	2.19646	2.90466	0.708195	15.2721	1.08539	0.874742	0.416848	0.343649
94	608	38	4	76-82	353.79	70.0364	Stored	18.0484			0.735005	23.8	27.2	30.9	35.5	41.6	29.4543	0.407005	0.348758	2.25792	2.81762	0.559694	14.7835	0.61613	0.316599	0.24279	0.181411
94	608	38	5	28-34	354.81	75.4992	Stored	18.074			0.745614	24.4	27.8	31.6	36.3	42.6	29.88	0.512253	0.324153	2.24187	2.8616	0.619727	10.6515	0.217915	0.111183	0.0862551	0.0681669
94	608	38	5	126-132	355.79	48.253	Stored	18.1416			0.759716	25.3	28.7	32.4	37.5	44.1	30.4365	0.447702	0.38273	1.29421	2.92122	1.62701	5.49894	0.0626162	0.013685	0.0135631	0.036995
94	608	38	6	76-82	356.79	68.1656	Stored	18.2231			0.722241	22.9975	26.3	30	34.5	40.3	28.9339	0.456689	0.301943	2.13216	2.76569	0.633537	11.1168	0.499074	0.19034	0.194111	0.176758
94	608	39	1	17-23	358.3	75.8934	Stored	18.3462	1	28.542	0.750551	24.7	28.1	31.9	36.8	43.1	30.076	0.366735	0.303078	2.07891	2.88232	0.803411	9.80649	0.418403	0.10762	0.156402	0.155747
94	608	39	1	126-132	359.39	78.1662	Stored	18.435			0.733931	23.7	27.1	30.8	35.4	41.6	29.4108	0.48134	0.351306	2.01017	2.81321	0.80304	9.91503	0.462704	0.193102	0.162361	0.172175
94	608	39	2	77-83	360.4	67.5306	Stored	18.5173			0.737938	23.9	27.4	31.1	35.8	42	29.5726	0.416645	0.364397	1.81863	2.8297	1.01107	8.51566	0.24247	0.086887	0.0754926	0.103691
94	608	39	3	21-27	361.34	75.8594	Stored	18.5939			0.685929	20.5	24.1	27.8	31.8	37.2	27.4015	0.612895	0.383169	1.58377	2.62389	1.04012	10.7906	0.0975384	0.0559927	0.0261954	0.0477842
94	608	39	3	125-131	362.38	83.9096	Stored	18.6787			0.704044	21.7	25.3	28.9	33.2	38.8	28.1758	0.712831	0.337462	1.14284	2.69354	1.5507	9.77608	0.506591	0.334612	0.101584	0.326537
94	608	39	4	74-80	363.37	79.7752	Stored	18.7736			0.801541	27.8	31.2	35.2	40.7	48	32.0285		0.636996	1.78555	3.10581	1.32026	8.45064	0.0191162	6.09151e-06	0.00399554	0.00619595
94	608	39	CC	31-33	364.31	36.5	New	18.8715			0.768858	25.9	29.2	33.1	38.2	44.7	30.7919	0.585583	0.444427	2.07095	2.96057	0.88962	13.6882
94	608	40	1	25-31	367.98	70.7423	Stored	19.1465			0.796337	27.4	30.8	34.8	40.1	47.2	31.835	0.659999	0.567206	1.40052	3.08221	1.68168	11.7493	0.442009	0.212358	0.0850116	0.218859
94	608	40	2	78-84	370.01	84.3244	Stored	19.2965			0.795641	27.5	30.8	34.8	40.2	47.2	31.8091	0.512143	0.441693	1.90721	3.07907	1.17186	12.6338	0.442365	0.257748	0.132584	0.164312
94	608	40	3	25-31	370.98	70.2734	Stored	19.3682			0.734623	23.7	27.1	30.9	35.5	41.6	29.4388	0.553839	0.377154	1.84152	2.81605	0.974524	7.49308	0.142551	0.0940589	0.0452869	0.0593441
94	608	40	3	129-135	372.02	76.5343	Stored	19.445			0.740133	24.1	27.5	31.2	35.9	42.2	29.6608	0.56481	0.45026	1.89964	2.83878	0.939145	6.70778	0.350179	0.167431	0.103569	0.128553
94	608	40	4	76-82	372.99	79.2134	Stored	19.5167			0.730995	23.6	26.9	30.6	35.2	41.3	29.2918	0.337645	0.31504	2.21464	2.80119	0.586548	7.25003	0.172861	0.0350206	0.0686996	0.0562972
94	608	40	4	115-120	373.375	36.0002	Stored	19.5451			0.74044	24	27.4	31.2	35.9	42	29.6731		0.329519	1.3219	2.84006	1.51816	9.08006	0.362244	1.34986e-05	0.0851462	0.21506
94	608	40	5	25-31	373.98	68.7903	Stored	19.5898			0.752186	24.8	28.2	31.9	36.8	43	30.1407	0.374997	0.359974	1.9285	2.88922	0.960719	7.8679	0.322055	0.0638855	0.106477	0.127722
94	608	40	cc	8-14	376.07	78.2318	Stored	19.71			0.699663	21.6	25	28.6	32.9	38.5	27.9904	0.401752	0.319139	1.54054	2.67649	1.13596	9.60728	0.341992	0.0871718	0.0953971	0.180231
94	608	41	3	25-31	380.58	67.3371	Stored	19.8159			0.710975	22.2	25.6	29.3	33.7	39.4	28.4668	0.522435	0.299725	1.93064	2.72076	0.790119	15.7265	0.194599	0.0910021	0.068963	0.0806662
94	608	41	4	120-124	382		New	19.8492			0.694277	21.3	24.6	28.2	32.5	38	27.7608	0.471485	0.306336	1.64865	2.65571	1.00706	9.18591
94	608	41	4	79-84	382.615	90.3351	Stored	19.8637			0.702629	21.7	25.2	28.8	33.1	38.7	28.1161	0.264635	0.310749	1.79946	2.68802	0.88856	8.98434	1.26675	0.197892	0.415887	0.571397
94	608	41	5	26-32	383.59	60.2359	Stored	19.8866			0.616646	15.8	19.6	23.2	26.9	31.4	24.2384	0.634407	0.382254	0.918221	2.37762	1.4594	7.82747	2.16762	0.778211	0.345832	1.52149
94	608	41	5	70-74	384.03		New	19.8969	0.925373	26.5364	0.692745	21	24.5	28.1	32.4	37.7	27.6952	0.391525	0.313816	1.21494	2.64984	1.4349	8.90095
94	608	41	5	124-130	384.57	81.253	Stored	19.9096	0.93	24.4789	0.672791	19.7	23.2	26.8	30.9	36.1	26.827	0.557237	0.317483	1.38775	2.57474	1.18699	8.0022	0.423087	0.211048	0.107715	0.242637
94	608	41	6	76-82	385.59	80.3227	Stored	19.9335			0.636902	17.2	20.9	24.5	28.3	33	25.1986	0.628514	0.402846	1.00787	2.44632	1.43845	6.3358	0.922387	0.382834	0.156299	0.617392
94	608	41	6	120-124	386.03	30.8	New	19.9439			0.644355	17.7	21.4	25	28.9	33.6	25.5442	0.357309	0.335657	0.841799	2.47229	1.63049	8.3536
94	608	41	7	24-30	386.57	100.082	Stored	19.9565			0.691748	21.1	24.4	28	32.3	37.9	27.6524	0.476361	0.315736	1.77474	2.64603	0.871287	8.22473	0.635976	0.266031	0.205103	0.290147
94	608	42	1	25-31	387.18	75.4728	Stored	19.9709			0.726335	23.2	26.6	30.3	34.9	40.7	29.1018	0.48572	0.3009	1.73733	2.78223	1.0449	10.2233	1.37173	0.507402	0.430296	0.650616
94	608	42	1	129-135	388.22	71.5828	Stored	19.9953			0.72159	22.9	26.3	30	34.6	40.5	28.9071	0.339208	0.298265	2.18706	2.76307	0.57601	8.28654	0.98748	0.254482	0.395388	0.335859
94	608	42	2	67-73	389.1	79.718	Stored	20.016			0.695375	21.2	24.6	28.3	32.5	38.1	27.8078	0.469207	0.305579	0.962067	2.65993	1.69787	7.73072	1.99141	0.394832	0.351683	1.40896
94	608	42	3	100-105	390.925	34.8229	Stored	20.3557			0.725485	23.1	26.5	30.3	34.8	40.6	29.067	0.374717	0.309466	2.09321	2.77879	0.68558	8.77751	0.986737	0.294577	0.371839	0.358811
94	608	42	4	79-85	392.22	65.9716	Stored	20.653			0.712987	22.3	25.8	29.4	33.8	39.5	28.5508	0.452745	0.294705	2.17265	2.72872	0.55607	8.74755	0.7918	0.36129	0.316161	0.273213
94	608	42	5	26-32	393.19	86.7494	Stored	20.8758			0.749594	24.7	28	31.9	36.7	42.8	30.0381	0.587856	0.298478	2.16389	2.87829	0.714401	7.24246	0.761431	0.525565	0.295845	0.266069
94	608	43	1	25-31	396.78	65.248	Stored	21.2328			0.733911	23.6	27.1	30.8	35.5	41.6	29.41	0.533054	0.300368	2.18653	2.81313	0.626592	7.62562	0.593763	0.29999	0.23264	0.201941
94	608	43	1	125-131	397.78	78.3619	Stored	21.2806			0.712449	22.4	25.7	29.4	33.8	39.5	28.5284	0.602329	0.293802	2.13045	2.72659	0.596144	7.44575	0.503147	0.384075	0.1976	0.180526
94	608	43	2	71-77	398.74		Stored	21.3265			0.721825	22.9	26.3	30.1	34.6	40.4	28.9168	0.551158	0.300463	2.18298	2.76402	0.581042	9.397
94	608	43	3	25-31	399.78	48.6858	Stored	21.3762			0.706757	21.9	25.4	29.05	33.5	39.1	28.2901	0.49884	0.314662	1.7545	2.70416	0.949658	7.59756	0.806959	0.35624	0.255788	0.374456
94	608	43	3	126-131	400.785	54.4757	Stored	21.4242	1	28.542	0.727942	23.3	26.7	30.4	35.1	41.1	29.1674	0.704408	0.300005	2.13657	2.78875	0.652185	7.43833	0.367882	0.384589	0.142845	0.130744
94	608	43	4	66-72	401.69	64.8831	Stored	21.4675			0.693828	21.1	24.6	28.2	32.5	37.9	27.7416	0.578865	0.312366	1.73174	2.65399	0.922254	7.84461	1.40084	0.894954	0.443723	0.659854
94	608	43	5	30-36	402.83	85.6925	Stored	21.5219			0.699492	21.5	24.9	28.5	32.8	38.4	27.9831	0.815037	0.301344	2.0457	2.67583	0.630128	6.43491	1.24068	2.46527	0.468782	0.47274
94	608	43	cc	10-16	403.85	52.356	Stored	21.5707			0.655132	18.5	22.1	25.7	29.7	34.6	26.0369	0.815923	0.344098	1.5788	2.51049	0.931684	8.25595	0.286126	0.403881	0.0800107	0.14417
94	608	44	2	8-13	407.705	41.2788	Stored	21.7549			0.679037	20.2	23.6	27.2	31.4	36.4	27.1015	0.72018	0.308746	2.08503	2.59796	0.51293	7.67689	1.4254	1.64037	0.546226	0.518094
94	608	44	2	16-19	407.775	31.6055	Stored	21.7583			0.629337	16.6	20.4	24	27.7	32.3	24.8436	0.733836	0.357603	1.56437	2.42035	0.85598	6.32959	1.50955	1.36856	0.421002	0.759586
94	608	44	3	14-20	409.27		Stored	22.2292			0.702484	21.6	25.1	28.7	33	38.5	28.1099	0.837185	0.304993	1.99272	2.68745	0.694739	7.24642
94	608	44	3	118-124	410.31	82.4761	Stored	22.6785			0.704356	21.9	25.3	28.9	33.2	38.9	28.189	0.745495	0.309443	1.90792	2.69476	0.786833	6.29841	1.9819	2.10267	0.684883	0.831696
94	608	44	4	62-68	411.25	80.5783	Stored	23.0845			0.697553	21.3	24.9	28.4	32.8	38.3	27.9007	0.765314	0.289046	1.92408	2.66833	0.744252	8.80268	0.132744	0.17293	0.0474118	0.0558999
94	608	45	1	5-9	415.78	40.2	New	23.5088			0.683632	20.4	24	27.6	31.7	37	27.3018	0.771697	0.289781	1.5587	2.61521	1.05652	7.18923
94	608	45	1	8-12	415.81	20.9	New	23.5113			0.691345	20.9	24.4	28	32.2	37.6	27.6351	0.770936	0.276642	1.67483	2.64449	0.969656	6.79174
94	608	45	1	75-81	416.48	69.9677	Stored	23.5684	1	28.542
94	608	45	2	26-32	417.49	69.8636	Stored	23.6545	1	28.542	0.741387	24.1	27.5	31.3	36	42.2	29.7111	0.477952	0.295039	2.34483	2.84399	0.499158	7.52067	1.20732	0.809022	0.516754	0.357515
94	608	45	3	80-86	419.53	52.9389	Stored	23.8284			0.738396	23.9	27.3	31	35.8	41.8025	29.591	0.519254	0.278493	2.516	2.83159	0.315597	5.40646	0.0612567	0.0400292	0.0283464	0.0155449
94	608	45	4	115-121	421.38	48.5498	Stored	23.9861			0.745696	24.5	27.8	31.5	36.3	42.8	29.8832	0.597128	0.29352	2.48797	2.86194	0.373969	7.28127	0.439898	0.326519	0.200104	0.111952
94	608	45	5	77-83	422.5	78.273	Stored	24.0816			0.755823	25.1	28.5	32.2	37.2	43.4	30.2839	0.869251	0.293759	2.31344	2.90463	0.591181	7.32023	0.231677	0.742373	0.0979178	0.0712652
94	608	45	6	27-33	423.5	56.8662	Stored	24.1668			0.72835	23.3	26.7	30.4	35	41	29.1841	0.972656	0.319508	2.14047	2.79041	0.649945	8.69997	0.267398	4.46464	0.101508	0.0922551
94	608	45	6	130-136	424.53	61.6451	Stored	24.2546			0.743071	24.3	27.6	31.4	36.1	42.3	29.7785	0.605398	0.292534	2.23504	2.85099	0.615952	10.1556	0.330869	0.206252	0.134436	0.108843
94	608	48	1	3-7	444.53	57.2	New	25.9594			0.770716	25.9	29.3	33.2	38.3	44.9025	30.8636	0.71889	0.374476	1.73544	2.96864	1.2332	12.8189
94	608	48	2	10-14	446.1		New	26.0932			0.768782	25.8	29.2	33.1	38.1	44.7	30.7889		0.360034	1.11264	2.96024	1.8476
94	608	48	4	10-14	449.1		New	26.349			0.803269	27.9	31.2	35.3	40.7	47.9	32.0925	0.747054	0.385249	2.06108	3.11368	1.0526	8.20348
94	608	48	6	103-107	453.03		New	26.684			0.724928	23.2	26.6	30.2	34.8	40.9	29.0442	0.58162	0.307898	1.95579	2.77653	0.820746	8.99125

## Sheet: DR13. pCO2 Calculation
Table DR3: pCO2 Calculation
											Sea surface temperature from BAYSPAR (This Study)															Sea surface temperature from the ẟ18O of surface dwelling planktonic foraminfiera (Pagani et al., 1999)
Leg	Site	Core	Section	Interval (cm)	Depth (mbsf)	Age	Globigernoides spp. ẟ13C (‰)	Alkenone (37:2) ẟ13C (‰)	Haptophyte Cell δ13Cbiomass (‰)		BAYSPAR SST Avg. (°C) 1	ε(Calcite->CO2(g)) (‰)	δ13CCO2(g) (‰)	ε(CO2(aq)-CO2(g)) (‰)	δ13CCO2(aq) (‰)	εp (‰)	KH	[CO2(aq)] (μmol/mol)	Average pCO2 (ppm)	2.5th Percentile pCO2 (ppm)	16th Percentile pCO2 (ppm)	84th Percentile pCO2 (ppm)	97.5th Percentile pCO2 (ppm)			Globigernoides spp. ẟ18O SST Avg. (°C)	ε(Calcite->CO2(g)) (‰)	δ13CCO2(g) (‰)	ε(CO2(aq)-CO2(g)) (‰)	δ13CCO2(aq) (‰)	εp (‰)	KH	[CO2(aq)] (μmol/mol)	Average pCO2 (ppm)	2.5th Percentile pCO2 (ppm)	16th Percentile pCO2 (ppm)	84th Percentile pCO2 (ppm)	97.5th Percentile pCO2 (ppm)
94	608	21	5	79-82	191.835	8.92358	2.7	-23.935	-19.8182		22.8	9.244	-6.48406	-1.07035	-7.54747	12.5189	0.03014	9.10975	302.248	225.916	263.384	345.224	397.606			16.2455	10.0305	-7.25775	-1.09889	-8.34866	11.7015	0.0360422	8.54982	237.217	184.743	209.004	267.38	299.673
94	608	22	1	104-107	195.705	9.20486	2.325	-23.165	-19.045		22.9	9.232	-6.84382	-1.06992	-7.90642	11.3548	0.0300654	8.33261	277.15	207.986	241.884	314.416	358.208			15.4526	10.1257	-7.7225	-1.10243	-8.81642	10.4272	0.0369088	7.80218	211.391	164.501	186.333	238.425	266.53							27
94	608	22	2	105-108	197.455	9.29289	2.15	-23.565	-19.4467		21.6	9.388	-7.17068	-1.07548	-8.23845	11.4305	0.031068	8.37909	269.702	198.609	233.364	306.428	349.399			16.8253	9.96096	-7.73392	-1.09632	-8.82176	10.8356	0.0354312	8.02719	226.557	177.199	200.252	254.393	283.408
94	608	22	3	55-58	198.965	9.36991	2	-23.445	-19.3262		22.9	9.232	-7.16584	-1.06992	-8.2281	11.3168	0.0300654	8.30945	276.379	207.647	240.588	313.524	360.598			15.7948	10.0846	-8.0039	-1.1009	-9.096	10.4318	0.0365303	7.80466	213.649	166.416	188.282	240.571	268.942
94	608	22	4	60-63	199.965	9.42113	2.25	-22.195	-18.0709		20.9	9.472	-7.15424	-1.07849	-8.22501	10.0271	0.0316384	7.59371	240.015	177.674	208.117	272.117	308.619			18.3258	9.7809	-7.45795	-1.08969	-8.53952	9.70679	0.0339357	7.43467	219.081	173.556	195.095	244.844	271.643
94	608	23	2	30-33	206.215	9.71775	2.4	-24.51	-20.3957		26.7	8.776	-6.32053	-1.05396	-7.36782	13.2991	0.027513	9.71719	353.186	270.459	310.025	404.849	473.128			15.916	10.0701	-7.59361	-1.10036	-8.68562	11.9538	0.0363979	8.71521	239.443	185.865	210.595	270.242	302.857
94	608	23	3	35-38	208.785	9.83566	2.15	-23.295	-19.1755		24.8	9.004	-6.79284	-1.06189	-7.84751	11.5495	0.0287233	8.45321	294.298	224.338	258.687	334.934	385.339			18.3958	9.7725	-7.54873	-1.08939	-8.62989	10.7518	0.0338689	7.97996	235.614	185.341	208.808	264.195	293.799
94	608	23	4	35-38	209.365	9.86476	2	-20.2	-16.0675		22.2	9.316	-7.24847	-1.07291	-8.3136	7.8805	0.0305963	6.64155	217.07	163.753	190.228	244.546	276.796			16.0713	10.0514	-7.97132	-1.09967	-9.06223	7.11965	0.0362295	6.35894	175.518	138.443	155.995	196.275	217.958
94	608	23	5	35-38	210.865	9.94106	1.8	-23.2	-19.0801		20.9	9.472	-7.60001	-1.07849	-8.67031	10.6123	0.0316384	7.90259	249.778	183.927	216.416	283.418	321.428			17.0096	9.93885	-8.05875	-1.0955	-9.14542	10.128	0.0352409	7.64522	216.941	169.612	191.914	243.759	271.336
94	608	23	6	52-55	212.365	10.0199	1.4	-22.99	-18.8693		22.8	9.244	-7.77215	-1.07035	-8.83418	10.2281	0.03014	7.69703	255.376	193.624	223.772	289.394	330.396			15.6533	10.1016	-8.61459	-1.10154	-9.70663	9.33883	0.036686	7.26	197.895	154.645	175.073	222.499	247.996
94	608	24	1	53-56	214.635	10.1142	2.3	-25.62	-21.5103		20.9	9.472	-7.1047	-1.07849	-8.17553	13.628	0.0316384	9.9982	316.014	228.648	271.171	362.336	416.511			15.5553	10.1134	-7.73514	-1.10198	-8.82859	12.9605	0.0367945	9.44394	256.667	198.007	225.382	291.454	328.756
94	608	24	2	57-60	216.145	10.1769	2.30667	-21.75	-17.624		26.8	8.764	-6.40123	-1.05354	-7.44803	10.3586	0.0274526	7.76562	282.874	219.925	250.009	320.634	370.338			16.4551	10.0054	-7.62245	-1.09796	-8.71205	9.07186	0.0358191	7.13831	199.288	156.584	176.495	223.597	248.587
94	608	24	3	55-58	217.685	10.2409	2.31	-23.01	-18.8893		24.8	9.004	-6.63427	-1.06189	-7.68911	11.4159	0.0287233	8.37006	291.403	222.902	255.766	330.986	380.469			16.7771	9.96675	-7.58119	-1.09653	-8.66941	10.4167	0.0354813	7.79659	219.738	171.747	194.054	246.874	275.688
94	608	24	4	53-56	219.165	10.3024	2.41333	-23.035	-18.9144		24.2	9.076	-6.60274	-1.06441	-7.66013	11.4713	0.0291321	8.40435	288.491	218.91	252.557	327.226	377.658			17.6515	9.86182	-7.37575	-1.09266	-8.46035	10.6556	0.0345928	7.92646	229.136	179.265	202.998	257.24	286.911
94	608	24	5	53-56	220.645	10.3638	2.4	-21.425	-17.2977		22.2	9.316	-6.85217	-1.07291	-7.91772	9.54503	0.0305963	7.35686	240.449	180.957	210.266	271.789	308.71			18.0336	9.81597	-7.34389	-1.09098	-8.42685	9.02694	0.0342175	7.11824	208.029	164.108	184.811	232.793	257.947
94	608	24	6	28-31	222.145	10.4261	2.6	-20.26	-16.1277		21.6	9.388	-6.72487	-1.07548	-7.79311	8.47124	0.031068	6.87892	221.415	165.817	193.274	249.646	281.412			17.0297	9.93644	-7.26425	-1.09541	-8.35171	7.90349	0.0352203	6.65048	188.825	148.491	167.768	211.069	234.195
94	608	24	7	76-79	223.395	10.4781	2.55	-25.025	-20.9128		24.2	9.076	-6.4673	-1.06441	-7.52483	13.674	0.0291321	10.0388	344.596	257.935	299.552	394.121	457.298			16.5708	9.99151	-7.36789	-1.09745	-8.45725	12.7216	0.0356971	9.26018	259.41	200.002	228.272	293.304	328.478
94	608	25	1	78-81	224.475	10.5229	1.785	-21.17	-17.0416		24.8	9.004	-7.15458	-1.06189	-8.20887	8.98584	0.0287233	7.09997	247.185	190.638	218.468	279.228	318.863			16.1758	10.0389	-8.17186	-1.0992	-9.26208	7.91436	0.0361168	6.65471	184.255	145.12	163.427	206.377	229.25
94	608	25	4	77-80	228.885	10.7061	1.9	-23.025	-18.9044		26.1	8.848	-6.88706	-1.05645	-7.93624	11.1795	0.0278819	8.22691	295.062	228.12	260.847	335.227	388.644			17.0057	9.93931	-7.9602	-1.09552	-9.04699	10.0473	0.0352449	7.604	215.747	168.627	190.978	242.066	269.767
94	608	25	6	50-53	231.985	10.8348	1.9	-21.355	-17.2274		22.8	9.244	-7.27673	-1.07035	-8.33929	9.04386	0.03014	7.12579	236.423	179.688	207.568	267.712	305.058			15.6646	10.1003	-8.11826	-1.10149	-9.2108	8.15708	0.0366735	6.75061	184.073	144.835	162.991	206.37	230.128
94	608	26	4	54-57	238.355	11.1888	1.9	-23.105	-18.9847		18.9	9.712	-7.73686	-1.08718	-8.81563	10.3659	0.0333949	7.76953	232.656	167.633	199.735	265.396	300.507			18.3411	9.77907	-7.80277	-1.08963	-8.88389	10.2963	0.0339211	7.73275	227.963	179.657	202.266	255.086	283.602
94	608	27	3	54-57	246.455	11.518	2.61667	-22.5	-18.3772		24.8	9.004	-6.33033	-1.06189	-7.3855	11.1975	0.0287233	8.23761	286.792	218.669	252.26	325.781	374.805			16.0238	10.0571	-7.3664	-1.09988	-8.45818	10.1047	0.0362809	7.63328	210.394	164.162	185.597	236.797	264.1
94	608	27	4	53-56	247.945	11.5786	1.7	-23.07	-18.9496		23.5	9.16	-7.39229	-1.06737	-8.45177	10.7006	0.0296263	7.95138	268.389	203.861	235.599	303.896	347.347			17.982	9.82216	-8.04316	-1.09121	-9.12559	10.0138	0.0342677	7.58696	221.402	174.066	196.169	248.11	276.163
94	608	27	6	56-59	250.975	11.733	2.6	-23.36	-19.2408		22.2	9.316	-6.65401	-1.07291	-7.71978	11.7471	0.0305963	8.57922	280.401	209.335	244.227	318.835	364.103			17.0483	9.93421	-7.26206	-1.09533	-8.34944	11.105	0.0352012	8.18283	232.458	181.365	205.191	261.506	292.39
94	608	28	2	47-50	254.485	11.965	2.034	-23.09	-18.9697		23.5	9.16	-7.06132	-1.06737	-8.12116	11.0583	0.0296263	8.15538	275.275	208.919	241.21	311.822	356.288			14.9821	10.1822	-8.06602	-1.10455	-9.16166	9.99767	0.0374405	7.57882	202.423	157.627	178.32	228.03	254.784
94	608	28	4	50-53	257.515	12.0374	1.7	-24.555	-20.4409		24.8	9.004	-7.23882	-1.06189	-8.29302	12.4013	0.0287233	9.02476	314.196	239.117	275.439	358.345	414.71			16.6012	9.98786	-8.2059	-1.09731	-9.29421	11.3792	0.0356651	8.34756	234.054	181.656	206.546	264.4	294.919
94	608	28	5	50-53	259.015	12.1077	1.83	-21.92	-17.7947		25.5	8.92	-7.02732	-1.05895	-8.07883	9.89193	0.0282629	7.52578	266.277	205.871	235.099	300.565	346.017			15.3262	10.1409	-8.22742	-1.103	-9.32135	8.6269	0.0370503	6.94432	187.429	147.025	165.769	210.347	234.57
94	608	28	6	42-46	260.585	12.1851	2.1	-22.635	-18.5128		25.5	8.92	-6.7597	-1.05895	-7.8115	10.9031	0.0282629	8.0656	285.377	218.773	250.825	323.176	372.652			15.8296	10.0805	-7.90081	-1.10075	-8.99286	9.69946	0.0364922	7.43111	203.635	159.315	180.105	229.302	255.942
94	608	29	1	50-53	262.615	12.2381	2.28	-23.595	-19.4768		25.5	8.92	-6.58129	-1.05895	-7.63328	12.0788	0.0282629	8.79948	311.343	238.44	273.33	354.541	409.467			16.5484	9.9942	-7.63786	-1.09755	-8.72703	10.9633	0.0357207	8.1002	226.765	176.717	199.968	255.119	285.134
94	608	29	2	54-57	264.115	12.2802	2.45	-22.78	-18.6584		26.7	8.776	-6.27097	-1.05396	-7.31831	11.5557	0.027513	8.45709	307.386	238.271	271.748	350.41	407.128			15.2384	10.1514	-7.624	-1.10339	-8.71898	10.1284	0.0371492	7.64543	205.803	159.972	181.499	231.719	259.244
94	608	29	5	54-57	268.675	12.4678	2.1775	-24.66	-20.5463		24.8	9.004	-6.76558	-1.06189	-7.82029	12.993	0.0287233	9.46945	329.678	250.468	288.22	376.29	435.567			14.5803	10.2304	-7.97131	-1.10635	-9.06885	11.7182	0.037905	8.56059	225.843	174.027	198.309	255.604	286.692
94	608	29	6	57-60	270.145	12.5179	2.1	-22.205	-18.0809		23.5	9.16	-6.99592	-1.06737	-8.05582	10.2097	0.0296263	7.68748	259.481	197.659	227.898	294.322	335.197			16.1384	10.0434	-7.86441	-1.09937	-8.95513	9.29385	0.0361571	7.2392	200.215	156.963	177.258	224.711	250.814
94	608	30	1	30-33	272.255	12.5881	2.344	-22.45	-18.327		25.5	8.92	-6.51786	-1.05895	-7.56991	10.9579	0.0282629	8.09707	286.491	220.441	252.464	324.721	372.316			16.0977	10.0483	-7.62763	-1.09955	-8.7188	9.78755	0.0362009	7.47414	206.463	161.176	182.211	231.648	258.263
94	608	30	2	50-53	273.785	12.639	2.2	-22.46	-18.337		25.5	8.92	-6.66059	-1.05895	-7.71249	10.823	0.0282629	8.02003	283.765	218.654	249.267	321.048	369.728			13.8639	10.3163	-8.03346	-1.10959	-9.13413	9.37479	0.0387579	7.2767	187.748	146.005	165.461	211.764	237.366
94	608	30	3	50-53	275.335	12.6906	2.45	-23.24	-19.1203		20.9	9.472	-6.95611	-1.07849	-8.0271	11.3094	0.0316384	8.305	262.497	193.05	227.644	298.554	340.142			14.333	10.26	-7.73072	-1.10747	-8.82963	10.4913	0.0381958	7.83666	205.171	158.835	180.436	231.956	259.455
94	608	30	5	54-57	278.215	12.7769	2.65	-23.48	-19.3613		22.9	9.232	-6.52179	-1.06992	-7.58474	12.0091	0.0300654	8.75228	291.108	217.545	252.888	331.112	378.04			15.8136	10.0824	-7.35818	-1.10082	-8.4509	11.1258	0.0365097	8.19509	224.463	175.227	197.754	253.35	283.085
94	608	31	1	52-55	281.835	12.8503	2.3575	-23.015	-18.8944		22.9	9.232	-6.81162	-1.06992	-7.87425	11.2323	0.0300654	8.25848	274.684	205.815	239.592	311.072	356.514			15.0888	10.1693	-7.73321	-1.10407	-8.82874	10.2595	0.0373188	7.71343	206.69	160.4	182.104	232.983	260.77
94	608	31	2	62-65	283.515	12.9274	2.08	-23.705	-19.5873		20.9	9.472	-7.32264	-1.07849	-8.39323	11.4177	0.0316384	8.37117	264.589	194.946	229.19	301.052	343.286			15.0642	10.1723	-8.01081	-1.10418	-9.10614	10.6905	0.0373468	7.94578	212.757	165.641	187.635	239.853	268.509
94	608	31	3	52-55	284.855	12.9829	2.48	-22.82	-18.6985		18.9	9.712	-7.16244	-1.08718	-8.24183	10.656	0.0333949	7.92663	237.361	171.576	203.876	270.727	306.671			14.3409	10.2591	-7.7001	-1.10743	-8.799	10.0882	0.0381865	7.62482	199.673	155.013	175.536	225.458	252.04
94	608	31	4	51-54	286.335	13.0994	2.62	-23.235	-19.1153		24.1	9.088	-6.40975	-1.06484	-7.46776	11.8745	0.0292016	8.66253	296.646	224.926	259.865	338.186	389.588			15.7495	10.0901	-7.39544	-1.10111	-8.48841	10.834	0.03658	8.02624	219.416	170.855	193.848	247.609	276.646
94	608	31	5	55-58	287.88	13.274	2.1	-24.865	-20.7522		20.2	9.556	-7.38542	-1.08152	-8.45896	12.5537	0.0322314	9.13526	283.428	205.659	244.032	324.144	371.756			14.6358	10.2237	-8.04149	-1.1061	-9.1387	11.8596	0.0378403	8.65268	228.663	177.108	200.989	259.119	291.245
94	608	31	6	52-55	289.435	13.326	2.736	-23.17	-19.05		16.3	10.024	-7.21567	-1.09865	-8.30639	10.9523	0.0359839	8.09383	224.929	155.391	189.478	258.281	292.314			15.6999	10.096	-7.28644	-1.10133	-8.37975	10.8775	0.0366345	8.05097	219.765	170.226	193.769	247.455	276.567
94	608	32	1	47-50	291.435	13.3929	2.5	-25.27	-21.1589		19.6	9.628	-7.06003	-1.08412	-8.1365	13.3039	0.0327581	9.72116	296.756	211.907	253.297	340.503	388.57			15.516	10.1181	-7.54178	-1.10215	-8.63561	12.794	0.0368382	9.31506	252.864	195.156	222.215	287.224	322.719
94	608	32	2	54-57	292.925	13.4428	2.605	-24.04	-19.9237		18.3	9.784	-7.10944	-1.08981	-8.1915	11.9707	0.0339604	8.72647	256.96	183.171	218.758	293.919	334.739			15.3728	10.1353	-7.45471	-1.10279	-8.54928	11.6056	0.036998	8.48864	229.435	177.038	201.788	259.791	291.169
94	608	32	3	84-87	294.465	13.4943	2.81667	-22.47	-18.3471		26.1	8.848	-5.97844	-1.05645	-7.02857	11.53	0.0278819	8.441	302.741	233.98	266.764	344.134	397.644			15.6064	10.1072	-7.21762	-1.10175	-8.31141	10.2232	0.0367379	7.6945	209.443	163.004	184.876	235.508	263.504
94	608	32	5	50-55	297.385	13.592	3.31	-23.32	-19.2006		24.2	9.076	-5.71414	-1.06441	-6.77247	12.6715	0.0291321	9.22251	316.575	237.983	275.731	360.132	416.105			14.8157	10.2021	-6.82251	-1.10529	-7.92026	11.5012	0.0376317	8.42298	223.827	173.171	196.909	253.614	285.111
94	608	33	1	100-104	301.055	13.7667	2.89	-24.07	-19.9538		20.3	9.544	-6.59109	-1.08109	-7.66505	12.539	0.0321452	9.12443	283.85	205.954	243.577	323.957	370.608			14.1671	10.2799	-7.31475	-1.10822	-8.41486	11.7739	0.038393	8.59663	223.911	172.485	196.415	253.257	285.98
94	608	33	1	145-149	301.355	13.7848	2.93333	-23.65	-19.532		23.5	9.16	-6.17015	-1.06737	-7.23094	12.5462	0.0296263	9.12971	308.162	231.914	268.793	351.124	404.114			14.3351	10.2598	-7.25205	-1.10746	-8.35148	11.4033	0.0381934	8.36231	218.947	168.702	191.869	247.501	279.197
94	608	33	2	26-29	302.315	13.8427	3.31	-21.365	-17.2374		24.8	9.004	-5.64319	-1.06189	-6.69908	10.7232	0.0287233	7.96394	277.264	212.936	244.552	313.865	360.931			16.1161	10.0461	-6.66907	-1.09947	-7.76121	9.6424	0.0361811	7.4035	204.623	160.142	180.97	230.095	256.279
94	608	33	2	6-10	302.515	13.8547	2.545	-25.12	-21.0082		22.8	9.244	-6.63764	-1.07035	-7.70089	13.5929	0.03014	9.96749	330.707	244.549	287.119	379.344	439.721			13.9899	10.3012	-7.67712	-1.10902	-8.77763	12.4931	0.0386055	9.09096	235.483	179.939	205.83	267.608	302.239
94	608	34	2	25-28	312.635	14.465	3.29667	-21.21	-17.0817		29.3	8.464	-5.12396	-1.04326	-6.16188	11.1096	0.0260401	8.18553	314.343	248.722	279.486	359.18	422.688			14.2766	10.2668	-6.89931	-1.10772	-7.99939	9.24019	0.0382627	7.21456	188.553	146.948	166.312	212.682	237.764
94	608	34	3	23-26	314.165	14.5573	2.92	-21.215	-17.0868		28.7	8.536	-5.56847	-1.04571	-6.60836	10.6606	0.0263631	7.92918	300.769	237.034	266.942	342.596	399.836			16.1361	10.0437	-7.05283	-1.09938	-8.14446	9.09776	0.0361596	7.14993	197.733	155.645	175.176	221.762	247.724
94	608	34	4	100-105	314.845	14.5983	2.41333	-22.36	-18.2366		22.9	9.232	-6.75629	-1.06992	-7.81899	10.6111	0.0300654	7.90193	262.825	196.938	229.212	296.972	339.837			14.5901	10.2292	-7.73671	-1.10631	-8.83446	9.57678	0.0378935	7.372	194.545	151.545	171.784	219.094	245.468
94	608	34	4	28-31	315.625	14.6453	2.62333	-25.05	-20.9379		32.6	8.068	-5.40109	-1.02995	-6.42548	14.8228	0.0244153	11.1721	457.584	355.43	401.262	538.589	667.966			14.2753	10.267	-7.56595	-1.10773	-8.66529	12.5351	0.0382642	9.12162	238.385	182.807	209.173	270.871	305.408
94	608	34	5	100-103	316.395	14.6918	2.7	-22.68	-18.5579		30.6	8.308	-5.56179	-1.03798	-6.594	12.1902	0.0253714	8.87599	349.842	275.791	309.954	402.523	477.615			13.4198	10.3696	-7.59091	-1.1116	-8.69408	10.0504	0.0393027	7.60554	193.512	149.932	169.908	218.75	245.486
94	608	34	6	92-95	317.825	14.7792	2.85	-25.7167	-21.6074		31.3	8.224	-5.33016	-1.03516	-6.35981	15.5843	0.0250275	12.0756	482.495	370.987	421.542	568.026	700.48			13.7605	10.3287	-7.40228	-1.11006	-8.50412	13.3927	0.0388836	9.79554	251.92	192.72	220.176	286.978	324.646
94	608	35	1	131-135	320.815	15.0301	2.91667	-25.29	-21.179		31.3	8.224	-5.26404	-1.03516	-6.29375	15.2073	0.0250275	11.6107	463.916	357.766	405.94	544.079	666.402			14.2246	10.273	-7.28157	-1.10796	-8.38146	13.0744	0.0383245	9.5341	248.773	190.966	217.872	283.292	319.934
94	608	35	6	10-16	327.33	15.7488	2.765	-24.41	-20.2952		28.7	8.536	-5.72216	-1.04571	-6.76189	13.8137	0.0263631	10.1642	385.548	298.248	339.457	445.927	528.128			15.1993	10.1561	-7.31677	-1.10357	-8.41227	12.1291	0.0371934	8.83391	237.513	182.761	208.417	269.291	303.233
94	608	35	cc	73-79	328.57	16.0665	3.19	-25.435	-21.3246		28.7	8.536	-5.30075	-1.04571	-6.34092	15.3101	0.0263631	11.7339	445.088	339.671	388.227	519.748	621.552			15.0358	10.1757	-6.91534	-1.1043	-8.01201	13.6026	0.0373792	9.97598	266.886	204.646	233.51	303.768	343.291
94	608	36	1	91-96	330.58	16.1107	3.17	-26.04	-21.9321		30	8.38	-5.1667	-1.04041	-6.20174	16.0831	0.025675	12.7511	496.634	377.135	432.299	583.638	709.965			14.7787	10.2066	-6.96546	-1.10546	-8.06322	14.1799	0.0376744	10.5082	278.922	211.999	243.221	317.887	360.529
94	608	36	2	120-126	331.56	16.1323	3.2	-24.45	-20.3354		28.7	8.536	-5.29084	-1.04571	-6.33102	14.2951	0.0263631	10.6213	402.885	309.933	353.553	465.876	555.375			13.4941	10.3607	-7.08727	-1.11127	-8.19066	12.3968	0.0392106	9.02155	230.079	176.857	201.475	261.95	296.018
94	608	36	3	78-84	333.235	16.3165	2.95667	-24.73	-20.6166		30	8.38	-5.37826	-1.04041	-6.41308	14.5025	0.025675	10.8312	421.856	327.634	370.195	490.52	591.995			14.2611	10.2687	-7.23768	-1.10779	-8.33745	12.5376	0.0382811	9.12346	238.328	183.255	208.874	270.948	305.074
94	608	36	3	120-126	333.53	16.4278	2.80333	-24.455	-20.3404		31.2	8.236	-5.38829	-1.03556	-6.41827	14.2112	0.025076	10.5387	420.272	328.51	370.228	491.767	599.255			12.8051	10.4434	-7.56109	-1.1144	-8.66706	11.9157	0.0400775	8.68983	216.826	166.034	189.696	246.521	278.323
94	608	36	4	24-30	334.61	16.6546	2.575	-21.31	-17.1822		32.6	8.068	-5.44904	-1.02995	-6.47338	10.896	0.0244153	8.06155	330.184	263.832	294.131	381.138	458.249			13.6079	10.3471	-7.69246	-1.11075	-8.79466	8.53414	0.0390704	6.90519	176.737	137.417	156.098	199.427	223.631
94	608	37	1	24-30	339.17	16.844	2.73333	-20.46	-16.3286		32.6	8.068	-5.29197	-1.02995	-6.31647	10.1783	0.0244153	7.67119	314.196	251.917	279.798	360.687	433.377			13.8176	10.3219	-7.51102	-1.1098	-8.61248	7.84418	0.038814	6.62749	170.75	133.166	150.969	192.227	214.137
94	608	37	2	116-122	341.18	17.0145	2.35	-17.4	-13.2557		34.5	7.84	-5.44729	-1.02242	-6.46414	6.88277	0.023573	6.27579	266.227	216.562	238.711	306.441	370.746			12.8595	10.4369	-8.00333	-1.11415	-9.10857	4.20282	0.040008	5.46709	136.65	107.285	120.98	153.449	170.582
94	608	37	5	75-81	345.97	17.3761	2.3	-18.35	-14.2097		32.6	8.068	-5.72184	-1.02995	-6.74589	7.57137	0.0244153	6.52375	267.199	215.711	239.715	305.042	363.294			13.1622	10.4005	-8.01716	-1.11277	-9.12101	5.16202	0.0396245	5.73143	144.644	113.529	128.035	162.278	180.927
94	608	37	6	76-82	347.11	17.484	2.8	-19.97	-15.8365		32	8.14	-5.29688	-1.03235	-6.32376	9.66582	0.0246938	7.41481	300.27	239.673	267.315	342.517	407.81			13.2822	10.3861	-7.50815	-1.11223	-8.61203	7.34073	0.039474	6.43855	163.109	127.566	143.953	183.629	205.012
94	608	38	2	76-82	350.78	17.7963	2.12667	-21.37	-17.2424		31.3	8.224	-6.0476	-1.03516	-7.0765	10.3443	0.0250275	7.75806	309.982	246.959	275.82	354.749	420.511			12.9528	10.4257	-8.21337	-1.11373	-9.31795	8.06351	0.0398891	6.71331	168.299	130.917	148.596	189.678	212.371
94	608	38	3	17-23	352.22	17.9015	2.1525	-21.68	-17.5537		32.6	8.068	-5.86816	-1.02995	-6.89206	10.8522	0.0244153	8.03656	329.161	262.67	293.065	379.321	457.416			14.0172	10.2979	-8.06241	-1.10889	-9.16237	8.54129	0.0385727	6.9082	179.095	139.471	157.998	201.744	225.005
94	608	39	1	31-35	359.39	18.435	2.05	-28.18	-24.0811		30.6	8.308	-6.20644	-1.03798	-7.23798	17.2588	0.0253714	14.6876	578.903	434.538	499.716	692.417	865.374			12.3607	10.4967	-8.35898	-1.11643	-9.46607	14.9757	0.0406531	11.3424	279.006	209.884	241.479	320.515	365.852
94	608	39	2	25-31	360.4	18.5173	1.9	-22.99	-18.8693		31.3	8.224	-6.27242	-1.03516	-7.30108	11.7906	0.0250275	8.60754	343.923	272.091	305.276	395.623	474.3			14.8241	10.2011	-8.21728	-1.10526	-9.31345	9.73958	0.0376219	7.45065	198.04	154.528	174.906	222.738	248.813
94	608	39	3	133-139	361.34	18.5939	1.8	-23.075	-18.9546		28.1	8.608	-6.7499	-1.04817	-7.791	11.3793	0.0266958	8.34759	312.693	243.996	276.538	356.628	416.325			11.8485	10.5582	-8.66668	-1.11878	-9.77576	9.35619	0.0413327	7.26805	175.843	135.27	154.43	198.96	223.103
94	608	39	3	78-84	362.38	18.6787	1.505	-23.12	-18.9998		28.7	8.536	-6.97149	-1.04571	-8.00991	11.2027	0.0263631	8.24076	312.588	245.233	277.031	356.719	416.64			11.2455	10.6305	-9.02955	-1.12155	-10.141	9.0304	0.0421555	7.11978	168.893	130.55	148.229	191.217	214.692
94	608	39	4	25-31	363.37	18.7736	2.1	-28.55	-24.4527		Methane Index >0.5, TEX86 SST Excluded and pCO2 not calculated															14.378	10.2546	-8.07187	-1.10727	-9.1702	15.6656	0.0381427	12.1807	319.346	240.727	276.809	367.447	420.317
94	608	40	1	129-135	367.98	19.1465	1.9	-22.705	-18.583																	11.3488	10.6181	-8.62654	-1.12108	-9.73795	9.01258	0.0420127	7.11184	169.278	131.061	148.805	191.748	215.684
94	608	40	1	76-82	369.06	19.2263	1.9	-22.945	-18.8241		35.2	7.756	-5.81093	-1.01966	-6.82467	12.2296	0.0232756	8.9034	382.52	303.39	338.155	449.813	569.572			12.4038	10.4915	-8.50234	-1.11623	-9.60908	9.39177	0.0405966	7.28462	179.439	138.574	157.801	203.122	228.186
94	608	40	2	115-120	370.01	19.2965	1.7	-25.62	-21.5103		35.2	7.756	-6.00939	-1.01966	-7.02293	14.8059	0.0232756	11.1535	479.192	372.259	418.64	573.662	739.638			12.1116	10.5266	-8.73466	-1.11757	-9.84247	11.9244	0.0409814	8.69556	212.183	162.943	185.523	241.28	272.64
94	608	41	3	124-130	380.58	19.8159	2	-24.31	-20.1948		29.3	8.464	-6.40975	-1.04326	-7.44632	13.0113	0.0260401	9.4839	364.203	284.538	321.788	419.63	496.363			13.1146	10.4063	-8.31968	-1.11299	-9.42341	10.9934	0.0396844	8.11761	204.554	157.187	179.496	231.69	260.379
94	608	41	6	129-135	385.59	19.9335	1.8	-28.31	-24.2117		24.8	9.004	-7.13971	-1.06189	-8.19402	16.4151	0.0287233	13.2442	461.095	337.601	396.103	536.973	638.314			12.6632	10.4604	-8.57076	-1.11505	-9.67625	14.8961	0.0402599	11.2531	279.511	209.829	242.441	321.493	366.409
94	608	42	5	25-31	393.19	20.8758	1.6	-24.6	-20.486		31.9	8.152	-6.49902	-1.03275	-7.52506	13.2321	0.0247409	9.66184	390.521	307.274	344.981	454.464	550.158			14.0944	10.2887	-8.60018	-1.10855	-9.69919	11.0124	0.0384799	8.12866	211.244	162.826	185.612	238.907	267.798
94	608	43	1	66-72	397.78	21.2806	2.3	-24.3	-20.1848		29.4	8.452	-6.10044	-1.04285	-7.13693	13.3166	0.0259872	9.73179	374.484	291.106	329.453	431.101	511.166			13.1664	10.4	-8.01666	-1.11275	-9.12049	11.2922	0.0396191	8.29456	209.357	161.461	183.36	237.414	267.385
94	608	43	2	30-36	398.74	21.3265	2.1	-25.485	-21.3748		30	8.38	-6.22781	-1.04041	-7.26175	14.4213	0.025675	10.748	418.617	324.042	367.769	487.02	583.59			11.199	10.6361	-8.44628	-1.12177	-9.55858	12.0743	0.0422199	8.79642	208.347	159.456	182.025	238.072	269.106
94	608	43	4	16-19	401.69	21.4675	2	-24.015	-19.8986		28	8.62	-6.56342	-1.04859	-7.60513	12.543	0.0267522	9.12742	341.184	264.629	301.355	390.954	456.983			8.9834	10.902	-8.80599	-1.13207	-9.92809	10.1729	0.0454701	7.6684	168.647	129.593	147.747	192.189	217.994
94	608	44	2	62-68	407.705	21.7549	2.5	-25.885	-21.7765		27.4	8.692	-6.13864	-1.05106	-7.18325	14.9181	0.027097	11.2776	416.195	317.547	363.765	482.525	576.635			12.6861	10.4577	-7.87531	-1.11494	-8.98147	13.0798	0.0402303	9.53845	237.096	181.239	207.065	270.644	306.485
94	608	44	4	26-32	411.25	23.0845	2.2	-28.29	-24.1916		28.7	8.536	-6.28237	-1.04571	-7.32152	17.2883	0.0263631	14.7439	559.262	413.743	481.288	663.137	816.612			12.2637	10.5084	-8.22196	-1.11687	-9.32965	15.2304	0.0407804	11.6381	285.386	213.914	246.401	328.866	375.936
94	608	45	1	80-86	416.48	23.5684	2.1	-24.52	-20.4057		29.4	8.452	-6.29876	-1.04285	-7.33505	13.3429	0.0259872	9.75374	375.328	291.632	330.364	430.929	511.027			12.2621	10.5085	-8.32111	-1.11688	-9.4287	11.2057	0.0407825	8.24252	202.109	155.508	177.266	229.288	258.631
1 Bold SST values are linearly interpolated from stratigraphically closest samples.
